1 **Title:** Where in the leaf is intercellular CO<sub>2</sub> (C<sub>i</sub>)? Considerations and recommendations  
2 for assessing gaseous diffusion in leaves

3 **Authors:** Joseph R. Stinziano<sup>1</sup>, Jun Tominaga<sup>1,2</sup>, David T. Hanson<sup>1\*</sup>

4 **Affiliations:**

5 <sup>1</sup>Department of Biology, The University of New Mexico, Albuquerque, NM 87104, USA,

6 <sup>2</sup>Department of Mathematical and Life Sciences, Hiroshima University, Hiroshima 739-  
7 8526, Japan

8 **\*Corresponding author:** David T. Hanson; email: [dthanson@unm.edu](mailto:dthanson@unm.edu)

9 Other email addresses: [jstinziano@unm.edu](mailto:jstinziano@unm.edu), [jtominaga@unm.edu](mailto:jtominaga@unm.edu)

10

11 **ORCiDs**

12 Joseph R. Stinziano: 0000-0002-7628-4201

13 Jun Tominaga: 0000-0001-7338-1826

14 David T. Hanson: 0000-0003-0964-9335

15

16 **Date of submission:** May 5, 2020

17 **Tables:** 2

18 **Figures:** 8 (1-7 color) plus 5 supplemental (all color)

19 **Word count:** 10,271

20

21 **Highlight**

22 Leaf water vapor and CO<sub>2</sub> exchange have been successfully used to model  
23 photosynthetic biochemistry. We review critical assumptions in these models and make  
24 recommendations about which need to be re-assessed.

25  
26 **Abstract**

27 The assumptions that water vapor exchange occurs exclusively through stomata, that  
28 the intercellular airspace is fully saturated with water vapor, and that CO<sub>2</sub> gradients are  
29 negligible between stomata and the intercellular airspace have enabled significant  
30 advancements in photosynthetic gas exchange research for nearly 60 years via  
31 calculation of intercellular CO<sub>2</sub> (C<sub>i</sub>). However, available evidence suggests that these  
32 assumptions may be overused. Here we review the literature surrounding evidence for  
33 and against the assumptions made by Moss & Rawlins (1963). We reinterpret data from  
34 the literature by propagating different rates of cuticular water loss, CO<sub>2</sub> gradients, and  
35 unsaturation through the data. We find that in general, when cuticle conductance is less  
36 than 1% of stomatal conductance, the assumption that water vapor exchange occurs  
37 exclusively through stomata has a marginal effect on gas exchange calculations, but  
38 this is not true when cuticle conductance exceeds 5% of stomatal conductance. Our  
39 analyses further suggest that CO<sub>2</sub> and water vapor gradients have stronger impacts at  
40 higher stomatal conductance, while cuticle conductance has a greater impact at lower  
41 stomatal conductance. Therefore, we recommend directly measuring C<sub>i</sub> whenever  
42 possible, measuring apoplastic water potentials to estimate humidity inside the leaf, and  
43 exercising caution when interpreting data under conditions of high temperature and/or  
44 low stomatal conductance, and when a species is known to have high cuticular  
45 conductance.

46  
47 **Keywords:** *cuticle conductance, mesophyll conductance, photosynthetic capacity,*  
48 *photosynthesis, stomatal conductance, transpiration, water use efficiency*

## 49 Introduction

50 Nearly 60 years ago, Moss and Rawlins (1963) introduced a calculation to estimate  
51 intercellular CO<sub>2</sub> concentrations ( $C_i$ ) under the assumption that all water flux out of the  
52 leaf occurs through the stomata. The importance of their findings was such that it  
53 quickly became dogma and is severely under-cited (<100 citations according to Google  
54 Scholar) despite underlying nearly every measurement of stomatal conductance ( $g_s$ )  
55 and  $C_i$ .  $C_i$  now plays a central role in plant gas exchange research: it is used to derive  
56 parameters for a biochemical model of leaf gas exchange through measurements of net  
57 CO<sub>2</sub> assimilation ( $A_{net}$ ) responses to CO<sub>2</sub> (Farquhar *et al.*, 1980), which in turn can be  
58 used to drive photosynthesis in coupled vegetation-climate models (e.g. Oleson *et al.*,  
59 2013), and  $C_i$  is a necessary starting point for estimating CO<sub>2</sub> fluxes within leaves all the  
60 way to the site of carboxylation (Evans *et al.*, 1986). However, this approach uses  
61 myriad assumptions that are generally not realistic (and almost physically impossible in  
62 other cases), including saturated vapor pressure in the leaf (Hygen, 1951, 1953; Slavik,  
63 1958; Jarvis & Slatyer, 1970; Ward & Bunce, 1986; Egorov & Karpushkin, 1988;  
64 Karpushkin, 1994; Campbell & Norman, 1998; Canny & Huang, 2006; Cernusak *et al.*,  
65 2018), negligible cuticular conductance (Boyer *et al.*, 1997; Meyer & Genty, 1998;  
66 Šantrůček *et al.*, 2004; Boyer 2015a; Tominaga & Kawamitsu, 2015a; Tominaga *et al.*,  
67 2018), homogenous stomatal conductance (Downton *et al.*, 1988; Terashima *et al.*,  
68 1988; Buckley *et al.*, 1997; Meyer & Genty, 1998), no CO<sub>2</sub> gradients within leaves (i.e.  
69 infinite CO<sub>2</sub> conductance; Parkhurst, 1984; Long *et al.*, 1989), no air pressure gradients  
70 within the leaf (Leuning, 1983; Dacey, 1987), strict Fickian diffusion of CO<sub>2</sub> into leaves  
71 (Leuning, 1983; Dacey, 1987), and resistances to gas diffusion are additive (i.e. follow  
72 the Ohm's law analogy, Parkhurst, 1984). For the purposes of this review, we define  
73 infinite conductance as a conductance high enough that a negligible concentration  
74 gradient forms between the two compartments in question. Here we review the concept  
75 of  $C_i$ ,  $g_s$ , and assumptions inherent in their calculations, and provide recommendations  
76 on moving beyond the Moss and Rawlins (1963) paradigm of assumptions.

77

78 The Moss and Rawlins (1963) paradigm

79 To calculate stomatal resistance, Gaastra (1959), with Brown and Escombe's (1900)  
80 Ohm's law analogy of resistances to gas diffusion (although this may not necessarily  
81 hold true: see Parkhurst, 1984), introduced a series of Equations:

82

$$83 \quad A_{net} = \frac{C_a - C_i}{r_{sc}} = g_{sc}(C_a - C_i) \quad \text{Eq. 1}$$

84

$$85 \quad E = \frac{W_i - W_a}{r_{sw}} = g_{sw}(W_a - W_i) \quad \text{Eq. 2}$$

86

87 where  $A_{net}$  is net CO<sub>2</sub> assimilation,  $C_a$  is the CO<sub>2</sub> concentration external to the leaf,  $r_{sc}$   
88 and  $g_{sc}$  is the stomatal resistance and conductance (reciprocal of resistance) to CO<sub>2</sub>,  $E$   
89 is transpiration through the stomata,  $W_a$  and  $W_i$  are the water vapor concentration  
90 external to the leaf and in the intercellular airspace,  $r_{sc}$  and  $g_{sc}$  is the stomatal resistance  
91 and conductance to water vapor. Considering the boundary resistance was negligibly  
92 small in the measurement system (which we also assume through this review), Moss  
93 and Rawlins (1963) expressed the diffusion properties of CO<sub>2</sub> and water vapor in leaves  
94 as:

95

$$96 \quad \frac{g_{sw}}{g_{sc}} = \frac{D_w}{D_c} \quad \text{Eq. 3}$$

97

98 where  $D_w$  and  $D_c$  are the diffusion coefficients for CO<sub>2</sub> and water vapor in air.  $D_w/D_c$  is  
99 usually assumed to be equal to ~1.6 (Li-Cor, 2019; although see Holmgren et al 1965  
100 *Physiologia Plant.* 18:557 where they use 1.7). Note that 1) Massman (1998) reported a  
101 mean ratio of 1.577 with uncertainties as high as 7% for the diffusivity of water vapour,  
102 2) the number is valid for Fickian diffusion, and 3) this may vary if the stomatal pore size  
103 is small enough that Knudsen diffusion occurs instead of Fickian diffusion (e.g.  
104 Parkhurst, 1994). Solving the system of Eqs.1-3 they obtained:

105

$$106 \quad C_i = C_a - 1.6 \left( \frac{A_{net}}{E} \right) (W_i - W_a) \quad \text{Eq. 4}$$

107

108 where  $W_i$  is assumed to be saturated for the leaf temperature ( $T_{leaf}$ ). Using conductance  
109 term, Eq. 4 can be rewritten as:

110

$$111 \quad C_i = C_a - 1.6 \frac{A_{net}}{g_{sw}} \quad \text{Eq. 5}$$

112

113 Given that  $C_a$  and  $A_{net}$  are directly measurable,  $g_{sw}$ , calculated from  $E$  and water vapor  
114 gradients ( $W_a - W_i$ ) (Eq. 2), would be the critical parameter that determines validity of  $C_i$   
115 (though measurement precision of  $C_a$  and  $A_{net}$  affects the calculation).

116

117 Based on the above, Moss and Rawlins (1963) introduced assumptions (both explicitly  
118 and implicitly) into the calculation of  $C_i$ :

- 119 1. All transpired water flows through stomata
- 120 2. No CO<sub>2</sub> or H<sub>2</sub>O gradients within leaves (internal conductance,  $g_{ias} = \infty$ )
- 121 3.  $W_i$  is at saturation ( $W_i =$  saturation vapor pressure,  $e_s$ ; mesophyll apoplast water  
122 potential,  $\Psi_{m,apo} = 0$ )
- 123 4. Uniform stomatal apertures over leaf surfaces
- 124 5. No air pressure gradients across leaf surfaces
- 125 6.  $\frac{D_w}{D_c} = 1.6$  (based on Fickian diffusion in air)
- 126 7. One-dimensional models approximate the three-dimensional leaf

127

128 For the purposes of this review, we are going to address the data surrounding the  
129 implications and failures of assumptions 1 to 3 in relation to  $C_i$  calculations and data  
130 derived from  $C_i$  and give a cursory overview on the remaining assumptions. Note that  
131 these assumptions equally apply to the von Caemmerer and Farquhar (1981)  
132 modification to Moss and Rawlins (1963).

133

134 *What do tests of Moss and Rawlins (1963) say?*

135 The first test of the calculation was done in 1982 (Sharkey *et al.*, 1982) whereby  $C_i$  was  
136 directly measured and compared to the calculated value based on the Moss and  
137 Rawlins assumption. Sharkey *et al.* (1982) used a dual open-flow/closed-flow system

138 whereby one side of the leaf was equilibrated in a closed system to measure  $C_i$ , while  
139 the other side was measured with the open-flow system used to calculate  $C_i$ . Note that  
140 this method requires a steady-state setup and assumes that the  $\text{CO}_2$  in the closed-flow  
141 system is in equilibrium with the internal airspace of the leaf. Sharkey *et al.* (1982)  
142 concluded that the calculated values were in “good agreement” with the measured  
143 values, although there were some deviations less than  $\pm 20 \mu\text{mol mol}^{-1}$  (Table 1). They  
144 also reported that at very high vapor pressure difference (VPD) and conductance less  
145 than  $60 \text{ mmol m}^{-2} \text{ s}^{-1}$ , the calculated  $C_i$  increased while the measured  $C_i$  decreased.  
146 Since then, fewer than 10 studies have assessed the Moss and Rawlins (1963)  
147 assumptions (Table 1) despite the fact that it is the foundation for a broad range of  
148 research activities. These studies employed direct  $C_i$  measurements similar to Sharkey  
149 *et al.* (1982), except for Boyer *et al.* (1997). Intriguingly, most evidence suggests that  
150 there are issues in the assumptions that lead to discrepancies between measured and  
151 calculated  $C_i$  (Table 1), with explanations ranging from cuticular water loss (Boyer *et al.*,  
152 1997), to patchy stomatal apertures (Downton *et al.*, 1988; Terashima *et al.*, 1988;  
153 Meyer & Genty, 1998) and intra-leaf  $\text{CO}_2$  gradients (Sharkey *et al.*, 1982; Mott &  
154 O’Leary, 1984; Parkhurst *et al.*, 1988; Parkhurst & Mott, 1990; Parkhurst, 1994).

155

#### 156 *Assumption 1 – all water flows through stomata*

157 Cuticular water loss is a proposed explanation for the reported discrepancies  
158 (Kirschbaum and Pearcy, 1988; Boyer *et al.*, 1997; Meyer & Genty, 1998; Boyer, 2015a;  
159 Tominaga & Kawamitsu, 2015a, Tominaga *et al.*, 2018). Using hypostomatous leaves of  
160 grape (*Vitis vinifera* L.), Boyer *et al.* (1997) measured gas exchange through the adaxial  
161 stomata-free side while the abaxial stomatous side was sealed. In this circumstance,  $C_i$   
162 was estimated to be near the compensation point ( $50 \mu\text{mol mol}^{-1}$ ) with a little  $\text{CO}_2$  flux  
163 on the cuticular side while calculations showed  $C_i$  close to  $C_a$ . As a result, the calculated  
164  $C_i$  was larger than the actual value by over a hundred  $\mu\text{mol mol}^{-1}$  (astomatous side of  
165 *Vitis vinifera* in Table 1). Later, this result was reproduced in the same species (Boyer  
166 2015b) with a direct system that reached  $C_a$  as high as several % to detect very small  
167  $\text{CO}_2$  fluxes through the cuticle (Boyer & Kawamitsu, 2011), as well as in passion fruits  
168 (*Passiflora edulis* Sims) (Tominaga *et al.*, 2018). Boyer (2015b) found that the

169 measured  $C_i$  increased by only 2  $\mu\text{mol mol}^{-1}$  above the  $\text{CO}_2$  compensation point of 44  
170  $\mu\text{mol mol}^{-1}$  despite the large  $\text{CO}_2$  gradients (10000  $\mu\text{mol mol}^{-1}$ ) across the cuticular  
171 surface, suggesting that the cuticle is an effective barrier against  $\text{CO}_2$  diffusion.  
172 Transpiration was always greater than assimilation through the cuticle, causing cuticle  
173 conductance for water vapor ( $g_{cw}$ ) to be 20-40 $\times$  larger than cuticle conductance for  $\text{CO}_2$   
174 ( $g_{cc}$ ), which is a much higher ratio than the 1.6 assumed for stomata (Eq. 3). This is  
175 likely because the pathway for  $\text{CO}_2$  in these experiments was from the leaf airspaces  
176 through the epidermal cells and cuticle, whereas the pathway for water diffusion was  
177 from the epidermal surface through the cuticle.

178

179 Calculations (Eq. 4) consistently overestimate the  $C_i$  for the astomatous side of  
180 hypostomatous leaves (Table 1). In contrast,  $C_i$  values were in closer agreement  
181 between direct measurements and calculations in the high  $\text{CO}_2$  tests for stomatous leaf  
182 surfaces in sunflower (*Helianthus annuus* L.) (Boyer & Kawamitsu (2011) in Table 1). It  
183 should be noted that von Caemmerer and Farquhar (1981) slightly modified Eq. 4 by  
184 including a ternary effect term that describes the hinderance of  $\text{CO}_2$  diffusion into the  
185 leaf due to the much larger flux of  $\text{H}_2\text{O}$  out of the leaf (Eq. B18 in von Caemmerer &  
186 Farquhar, 1981), and this version is used more generally and also in Table 1. Boyer &  
187 Kawamitsu (2011) experimentally validated this modification under high  $C_a$  that  
188 enhanced the ternary effect, and thus direct measurements include this effect.

189

190 To see the cuticle effect on both leaf sides (cuticle plus stomata), Boyer (1997)  
191 recalculated  $C_i$  in the standard measurements for both sides using the cuticle  
192 conductance determined on the same leaf (*Vitis vinifera* (both sides) in Table 1). The  
193 results suggest that the cuticle effect can be substantial— $C_i$  differential is 126  $\mu\text{mol mol}^{-1}$   
194 at 1100  $\mu\text{mol mol}^{-1}$   $C_a$ — when  $g_{sw}$  is relatively small, but only marginal— $C_i$  differential  
195 of 3  $\mu\text{mol mol}^{-1}$  at 350  $\mu\text{mol mol}^{-1}$   $C_a$ — when  $g_{sw}$  is relatively large. This conclusion was  
196 recently confirmed with direct measurements in amphistomatous sunflower leaves with  
197 stomata closed by feeding ABA (Boyer, 2015a; Tominaga & Kawamitsu, 2015a), and  
198 amphistomatous bean (*Phaseolus vulgaris* L.) leaves with low stomatal density (SD)  
199 (Tominaga et al., 2018), as summarized in Table 1. In these studies (Tominaga &

200 Kawamitsu, 2015a; Tominaga et al., 2018), calculation and direct measurements draw  
201 essentially the same  $A/C_i$  response curves when  $g_{sw}$  was large ( $g_{sw}>250 \text{ mmol m}^{-2} \text{ s}^{-1}$ )  
202 with open stomata and/or high SD. In contrast, when  $g_{sw}$  was small ( $g_{sw}<50 \text{ mmol m}^{-2} \text{ s}^{-1}$ )  
203 with closed stomata and/or low SD,  $A/C_i$  curves were depressed due to over-  
204 estimation of the calculated  $C_i$ . The similar depression was also confirmed with the  
205 standard open-flow measurements for both sides (Tominaga & Kawamitsu, 2015a), as  
206 was observed previously in similar ABA treatments (Downton et al., 1988; Terashima et  
207 al., 1988). Clearly, this should create a problem for interpreting gas exchange  
208 measurements. Cuticular water loss also causes calculated  $C_i$  to be lower than the  
209 actual value when  $\text{CO}_2$  is diffusing out from the leaf as it overestimates the  $\text{CO}_2$  transfer  
210 through stomata regardless of diffusional direction. In accordance, negative  $C_i$   
211 differentials were found with negative  $A_{net}$  in dark, and low  $C_a$  in light (Table 1).

212

213 There are debates as to whether and when cuticular water loss would be a significant  
214 portion of water loss across the leaf (Ledford, 2017). Generally, we would expect cuticle  
215 conductance to be more significant at low values of  $g_{sw}$  as noted above (Meyer and  
216 Genty, 1998; Flexas *et al.*, 2002; Lawlor, 2002) and under heat stress where the cuticle  
217 could undergo a state change to become very permeable to water (although note that  
218 cuticular melting may not occur until temperatures  $>60 \text{ }^\circ\text{C}$ , Bargel et al., 2006). But how  
219 large is leaf cuticle conductance and water loss? Unfortunately, biologists studying  
220 cuticle properties often focus on cuticle permeance (units:  $\text{m s}^{-1}$ ), which can hinder  
221 comparisons with gas exchange where conductance and flux are normally measured  
222 (units  $\text{mol m}^{-2} \text{ s}^{-1}$ ). A series of equations permits the calculation of conductance and flux  
223 from permeance. For conductance (Hall, 1982; Nobel, 1991):

224

$$225 \quad g_{cw} = P_c \frac{p}{RT} \quad \text{Eq. 6}$$

226

227 Where  $g_{cw}$  is cuticular conductance for water vapor ( $\text{mol m}^{-2} \text{ s}^{-1}$ ),  $P_c$  is cuticular  
228 permeance ( $\text{m s}^{-1}$ ),  $p$  is atmospheric pressure (Pa),  $R$  is the universal gas constant  
229 ( $8.314 \text{ m}^3 \text{ Pa K}^{-1} \text{ mol}^{-1}$ ), and  $T$  is temperature (K). And for the flow rate of water across



230 the cuticle (flux, transpiration), assuming steady-state conditions (Riederer and  
231 Schreiber, 2001):

232

$$233 \quad E_c = \frac{P_c(W_i - W_a)}{18.02} \quad \text{Eq. 7}$$

234

235 Where  $E_c$  is cuticular transpiration (water flux) across the cuticle ( $\text{mol m}^{-2} \text{s}^{-1}$ ),  $P_c$  is  
236 cuticular permeance ( $\text{m s}^{-1}$ ),  $W_i$  is the water vapor concentration adjacent to the outer  
237 epidermal wall ( $\text{g m}^{-3}$ ),  $W_a$  is the water vapor concentration at the leaf surface ( $\text{g m}^{-3}$ ),  
238 and 18.02 is the molar mass of water ( $\text{g mol}^{-1}$ ).

239

240 Cuticle permeances ( $\text{m s}^{-1}$ ) available in Riederer & Schreiber (2001) were converted  
241 into  $g_{cw}$  and  $E_c$  values wherever sufficient data were available in the original papers to  
242 perform the calculations (Table 2). Mean  $g_{cw}$  calculated from Riederer and Schreiber  
243 (2001) was  $0.511 \pm 0.101 \text{ mmol m}^{-2} \text{ s}^{-1}$  (range: 0.015 to  $5.862 \text{ mmol m}^{-2} \text{ s}^{-1}$ ), while mean  
244  $E_c$  was  $15.18 \pm 2.66 \text{ } \mu\text{mol m}^{-2} \text{ s}^{-1}$  (range: 0.46 to  $134.36 \text{ } \mu\text{mol m}^{-2} \text{ s}^{-1}$ ) (Table 2; Fig 1a).  
245 How do these  $g_{cw}$  values compare to stomatal conductance?

246

247 We compared the range in  $g_{cw}$  values above to the stomatal conductances ( $g_{sw}$ )  
248 reported in Douthe *et al.* (2011), Vrábl *et al.* (2009), and Scafaro *et al.* (2011) (which we  
249 also use to test the implications of  $g_{cw}$  on mesophyll conductance,  $g_m$ , below; see Pons  
250 *et al.*, 2009 for a discussion of this). Given that measured  $g_{sw}$  from the studies used for  
251 the  $g_m$  analysis varied from 43.6 to  $1,253 \text{ mmol m}^{-2} \text{ s}^{-1}$  (mean:  $474 \pm 44 \text{ mmol m}^{-2} \text{ s}^{-1}$ ), a  
252 quick estimate suggests that  $g_{cw}$  could range between 0.001 and 13% of  $g_{sw}$   
253 measurements (calculation based on means: 0.1% of  $g_{sw}$ ), which may have significant  
254 implications for gas exchange measurements in certain species under some conditions.

255

256 Analyzing Eq. 7, there are two unknowns ( $P_c$  and  $W_i$ , though  $P_c$  is measurable in  
257 astomatous cuticles), necessitating an assumption about the value of either  $P_c$  or  $W_i$ .  
258 Typically,  $W_i$  is assumed to be equal to the water vapor concentration of the saturation  
259 vapor pressure at  $T_{leaf}$ . However, it is difficult to assess whether this assumption holds,  
260 as the site of evaporation for cuticle conductance is within the cell wall of the epidermis

261 and reflects a different site of evaporation than for airspace  $W_i$ . This assumption may be  
262 broken during the dry-down experiments for gravimetrically-determined cuticular water  
263 loss. During these measurements, water loss rates decline over time until a breakpoint  
264 and a constant rate of water loss are achieved. Beyond the breakpoint, stomata are  
265 assumed to be closed. Furthermore, despite the leaf having lost a substantial amount of  
266 water, the  $W_i$  assumption is used to calculate  $P_c$ , with  $W_i$  assumed to be the same for  
267 the cell wall of the epidermis and the intercellular airspace. Therefore, at a given value  
268 of  $E_c$ , when the  $W_i$  assumption is violated, then  $P_c$  will change. In this way, it is possible  
269 that much of the literature on cuticular water loss is mis-estimating cuticular  
270 permeances, and therefore cuticular conductance. This could explain why gas  
271 exchange estimates of cuticular conductance often far exceed the conductance  
272 measured using the gravimetric method or isolated cuticles, although leaky stomata in  
273 the gas exchange methods could contribute to these differences as well.

274

#### 275 *Assumption 2 – no CO<sub>2</sub> or H<sub>2</sub>O gradients within leaves*

276 Due to finite intercellular CO<sub>2</sub> conductance in leaves ( $g_{ias}$ ), adaxial-abaxial gradients of  
277  $C_i$  must exist along the mesophyll cells (CO<sub>2</sub> sink). In amphistomatous leaves, CO<sub>2</sub>  
278 diffuses through stomata on both sides, and the diffusion path meets somewhere in the  
279 middle of the leaf where the gradient ends. Because CO<sub>2</sub> diffuses slowly through  
280 cuticle, larger  $C_i$  gradients would develop in hypostomatous leaves than in  
281 amphistomatous leaves as the path-length could be longer in the airspace (Parkhurst  
282 and Mott, 1990; Evans and Loreto, 2000). Direct measurement technically alters amphi-  
283 to hypostomatous leaves by closing one surface, thereby doubling the diffusion path  
284 (e.g., Fig. 9 in Boyer & Kawamitsu, 2011). While CO<sub>2</sub> is entering through one side,  
285 direct measurements measure the CO<sub>2</sub> equilibrated at the opposite side—end of the  
286 diffusion path—and thus measures the lowest  $C_i$  for the gradient. Therefore, positive  $C_i$   
287 differentials observed in amphistomatous leaves may be associated with the gradient.  
288 Parkhurst et al. (1988) explored this effect by observing 20-60  $\mu\text{mol mol}^{-1}$   $C_i$  differentials  
289 at about ambient 300-350  $\mu\text{mol mol}^{-1}$  CO<sub>2</sub> in five amphistomatous species (Table 1).  
290 Considering the differential as the  $C_i$  gradient, they estimated the difference between  
291 calculated  $C_i$  and mean  $C_i$  to be 1/6 of the gradient or 3-10  $\mu\text{mol mol}^{-1}$  for these

292 amphistomatous species, according to the one-dimensional diffusion analysis. Their  
293 estimation depends on the location of calculated  $C_i$  which, in turn, depends on the  
294 diffusion path for water vapor because calculations assume the same pathway for  $\text{CO}_2$   
295 and  $\text{H}_2\text{O}$  in stomatal conductance. The diffusion path for stomatal conductance is then  
296 defined by the point where the gradients of water vapor starts (i.e. the conceptual  
297 evaporating surface), that is  $W_i$  (Eq. 2). Parkhurst et al. (1988) and Sharkey et al. (1982)  
298 considered this was right beneath stomata or stomatal cavity. However, this may not be  
299 true due to water vapor gradients and/or unsaturation of water vapor in the leaf airspace  
300 (see below). For the  $C_i$  differentials they observed, cuticle conductance might have an  
301 impact especially when stomatal conductance was small, yet they did not report  $g_{sw}$   
302 (Table 1).

303

304 Dual sided open-flow data on amphistomatous leaves suggest that  $\text{CO}_2$  concentrations  
305 gradients are minimal across the leaf surface (Mott & O'Leary, 1984), however it is  
306 important to note that these data relied on the assumption that  $W_i$  is saturated at the  
307 substomatal cavity. Calculations for  $C_i$  are at the physical evaporating surfaces ( $W_i$ ),  
308 which is not necessarily in the substomatal cavity. Therefore, such data do not provide  
309 evidence against a  $\text{CO}_2$  concentration gradient *per se*, but rather that the  $\text{CO}_2$   
310 concentration gradient is less than that required to cause a substantial difference  
311 between  $[\text{CO}_2]$  at the evaporating surfaces on the adaxial and abaxial sides of the leaf.

312

313 As mentioned above, location of  $W_i$  is critical to define location of  $C_i$  through altering the  
314 diffusion path(-length) for stomatal conductance as illustrated in Fig. 2a. In general,  $W_i$   
315 is considered to be saturated at  $T_{leaf}$  or 100% relative humidity (RH) throughout the  
316 airspace up until sub-stomatal cavity (shown as 100 in Fig. 2a). In this representation,  
317 calculated  $C_i$  is at the sub-stomatal cavity ( $C_{i,s}$ ), and the  $C_{i,s}$  is further reduced toward  
318 the mesophyll cell surface ( $C_{i,ias}$ ) due to finite  $g_{ias}$ . When leaves are transpiring through  
319 stomata, evaporation essentially occurs on the cell surfaces exposed to the intercellular  
320 airspace (e.g., apoplast of the mesophyll cells). As for assimilation, a  $W_i$  gradient must  
321 exist from the evaporating surface to the stomatal cavity due to finite conductance to  
322 water vapor (shown as blue gradient on left hand side of Fig. 2a). In such case, the

323 calculated  $C_i$  would be closer to the mesophyll cell surfaces where 100% RH occurs  
324 (i.e.,  $C_{i,ias}$ ).

325

326 *Assumptions 3* –  $W_i$  saturation and  $\Psi_{m,apo} = 0$  MPa

327 Besides  $W_i$  gradients, water potential of the water on the evaporating surface of the  
328 apoplast of the mesophyll cells ( $\Psi_{m,apo}$ , the location most pertinent to  $C_i$ ) would affect  
329 the location of saturated  $W_i$  because RH over a solution is a function of  $\Psi$  of the solution  
330 as (Campbell & Norman, 1998):

331

$$332 \quad RH = \exp\left(\frac{M_w \psi}{RT}\right) \quad \text{Eq. 8}$$

333

334 where  $M_w$  is the molecular weight of water ( $0.018 \text{ kg mol}^{-1}$ ),  $\Psi$  is the water potential in J  
335  $\text{kg}^{-1}$  (numerically equivalent to kPa),  $R$  is the universal gas constant ( $8.314 \text{ J K}^{-1} \text{ mol}^{-1}$ ),  
336 and  $T$  is the temperature in K. Eq. 8 indicates that RH in the airspace decreases as the  
337  $\Psi_{m,apo}$  declines. If we assume that apoplastic and symplastic water potentials are in  
338 equilibrium in leaves, bulk water potential in leaf tissue ( $\Psi_{leaf}$ ), which we normally  
339 measure, may approximate the  $\Psi_{apo}$ . We note that it is the water potential at the  
340 mesophyll apoplast that matters most for  $C_i$  calculations that are relevant for  
341 photosynthetically active tissues. Water potential of the bulk apoplast ( $\Psi_{apo}$ ) is  
342 composed of both mesophyll and bundle sheath apoplastic components ( $\Psi_{m,apo}$  and  
343  $\Psi_{b,apo}$ ), and thus may be insufficient for calculating  $W_i$ . However, the importance of this  
344 depends on the ratio of mesophyll to bundle sheath. If we assume that the bundle  
345 sheath + epidermal transpiration is small relative to mesophyll transpiration, then we  
346 can assume that  $\Psi_{apo} \approx \Psi_{m,apo}$ .

347

348 However if we assume for a moment that  $\Psi_{leaf} = \Psi_{apo}$ , and  $\Psi_{m,apo}$  is the relevant value  
349 for calculating  $W_i$ , for a leaf at night,  $\Psi_{leaf}$  can be as high as  $-0.1$  MPa, corresponding to  
350 a  $W_i$  that is 99.9% RH, while a leaf at daytime with a  $\Psi_{leaf}$  of  $-2.0$  MPa corresponds to a  
351  $W_i$  of 98.5% RH (Eq. 8). Martínez-Vilalta et al. (2014) compiled a global dataset of water  
352 potential measurements, finding median predawn  $\Psi_{leaf}$  of  $-0.69$  MPa (mean:  $-0.111$   
353 MPa, IQR:  $-0.13$  –  $-0.34$  MPa) and midday  $\Psi_{leaf}$  of  $-1.72$  MPa (mean:  $-2.05$  MPa, IQR: -

354 2.41 MPa – -1.23 MPa) corresponding to 99.5% (mean: 99.2%, IQR: 99.1 – 99.8 %) RH  
355 at predawn (assuming leaf temperatures of 25 °C) and 98.8% (mean: 98.5%, IQR: 98.3  
356 – 99.1%) RH at midday. The effect of unsaturation on the calculation is illustrated on  
357 right hand side of Fig. 2a. 100% RH no longer exists in the intercellular airspace.  
358 Instead, it is located an imaginary point within the mesophyll cell ( $C_{i,liq}$ ), thereby causing  
359 the calculated  $C_i$  to be lower than the actual  $C_i$  in the airspace.

360

361 Some studies have suggested that the airspace could be unsaturated (Hygen, 1951,  
362 1953; Slavik, 1958; Jarvis & Slatyer, 1970; Ward & Bunce, 1986; Egorov & Karpushkin,  
363 1988; Karpushkin, 1994; Canny & Huang, 2006; Cernusak *et al.*, 2018, 2019), while  
364 others have considered that effect of the  $\Psi_{leaf}$  is so small that the 100% RH can be  
365 assumed (Farquhar & Raschke, 1978; Jones & Higgs, 1980; Sharkey *et al.*, 1982;  
366 Parkhurst *et al.*, 1988; Buckley *et al.* 2017, Buckley and Sack 2019). However,  
367 Cernusak *et al.* (2018) recently estimated that the relative humidity could be as low as  
368 77% and 87% ( $\Psi \approx -35$  MPa and  $-18$  MPa, respectively) in *Pinus edulis* and *Juniperus*  
369 *monosperma* when the leaves opened stomata and actively photosynthesized. If true,  
370 unsaturation can have significant impact on the calculations at least in those species.

371

#### 372 *Assumption 4 – uniform stomatal apertures over leaf surfaces*

373 Non-uniform stomatal apertures or stomatal ‘patchiness’ is another factor that could bias  
374 calculation of  $C_i$  (Downton *et al.*, 1988; Terashima *et al.*, 1988). They found patchy  
375 distribution of  $A_{net}$  throughout the leaves fed with ABA and proposed that if it is  
376 associated with stomatal patchiness,  $C_i$  would vary among patches and averaged  $C_i$   
377 would be overestimated based on the conductance-weighted calculation (Eq. 5;  
378 Mansfield *et al.*, 1990; Terashima, 1992; Buckley *et al.*, 1997). Patchiness likely occurs  
379 in plants under water stresses that induce stomatal closure, however it is not a general  
380 phenomenon as it appears to depend on species, growth conditions, and how quickly  
381 the stress is imposed (Cheeseman 1991, Gimenez *et al.*, 1992; Gunasekera &  
382 Berkowitz, 1992; Wise *et al.*, 1992; Tezara *et al.*, 1999; Mott & Buckley, 2000). A  
383 number of methods have been used to assess patchiness in conjunction with gas  
384 exchange measurements (Terashima, 1992): starch accumulation (Terashima *et al.*,

385 1988), autoradiography of fixed  $^{14}\text{CO}_2$  (Downton et al., 1988a,b; Gunasekera &  
386 Berkowitz, 1992; Sharkey & Seemann, 1989; Wise et al., 1992), fluorescence imaging  
387 (Daley et al., 1989; Mott, 1995; Meyer & Genty, 1998). Although the results often have  
388 been attributed to patchy stomatal closure, these methods depend on photosynthetic  
389 metabolism and could as well reflect non-uniform metabolism (Lauer & Boyer, 1992;  
390 Wise et al., 1992). Also, lateral  $\text{CO}_2$  diffusion and different stomatal behavior on both  
391 surfaces in amphistomatous leaves should affect the extent of observed patchiness.  
392 More independent and direct measurements of aperture/ $g_{sw}$  distributions, such as direct  
393 observations (Laisk et al., 1983; Van Gardingen et al., 1989; Lawson et al., 1997) and  
394 thermal imaging (West et al., 2005; McAusland et al., 2013), may be preferable. The  
395 problems associated with stomatal patchiness are also attributable to  $T_{leaf}$  distributions  
396 that are difficult to measure accurately and are needed for  $W_i$ . Direct  $C_i$  measurement  
397 can avoid these effects as it does not rely on conductance (Lauer & Boyer, 1992; Boyer  
398 & Kawamitsu, 2011).

399

#### 400 *Assumption 5 – no pressure gradients across leaf surfaces*

401 Pressure gradients across the leaf surface would have direct impact on the  
402 concentration gradients because same atmospheric pressure is assumed for both inside  
403 and outside the leaf. There is evidence that humidity- and thermal- induced pressure  
404 gradients can exist across leaves, with data suggesting that this is the case in *Nelumbo*  
405 (Leuning, 1983; Dacey 1987) and *Nuphar lutea* (Dacey, 1981), however such pressure  
406 gradients may be associated most closely with aquatic plants (Steinberg, 1996). A  
407 modeling analysis suggests that intercellular airspace could be pressurized by up to 4  
408 kPa—3.9% of 101.3 kPa for standard atmosphere—across the leaf (e.g. Steinberg,  
409 1996), and that pressure gradients should increase with saturation of the intercellular  
410 airspace. If such pressurization can occur in terrestrial plants (which could happen  
411 under low  $g_{ias}$  values and increasing radiation loads as suggested by Steinberg, 1996),  
412 the possibility exists, therefore, that while  $W_i$  may not be equal to  $e_s$  *per se*, it may equal  
413  $e_s$  at ambient air pressure if the leaf is pressurized and leaf RH < 100%, and or exceed  
414 the expected  $e_s$  if leaf RH is close to or greater than 100%.  $W_i$  calculated with the  
415 external ambient pressure would be lower than the actual  $W_i$  inside the leaf (i.e., the

416 actual  $W_i$  is greater than 100% RH). To our knowledge, however, there are no studies  
417 demonstrating leaf to air pressure gradients in terrestrial plant species.

418

419 *Assumption 6 – Fickian diffusion of CO<sub>2</sub> and H<sub>2</sub>O*

420 In the case of pressure gradients across the leaf in aquatic plants, the pressure  
421 gradients can be established because pore sizes are small enough that Knudsen  
422 diffusion is dominant over Fickian diffusion (Steinberg, 1996). Thus, it is possible that in  
423 some terrestrial species, the pore sizes could be sufficiently small as to cause Knudsen  
424 diffusion to occur, altering the diffusivity constants for CO<sub>2</sub> and H<sub>2</sub>O, although stomatal  
425 pore size would need to be quite small for this effect (e.g. < 1 μm, Leuning, 1983), and  
426 the ratio of Knudsen diffusion coefficients for H<sub>2</sub>O and CO<sub>2</sub> would be 1.56 as the ratios  
427 are dependent on pore size and molecular mass. Thus, while Knudsen diffusion may  
428 occur in some cases, the assumption of Fickian diffusion is likely sufficient for terrestrial  
429 plants in most cases.

430

431 *Assumption 7 – one dimension approximates the three-dimensional leaf*

432 The equations used in gas exchange are typically one dimensional, and it is generally  
433 assumed that this is sufficient to capture the behaviour of the leaf area measured  
434 through gas exchange. However, this may be insufficient (Parkhurst, 1977) and three-  
435 dimensional models predict that some gas exchange traits could be strongly affected  
436 (Parkhurst, 1994; Earles et al., 2018). Furthermore, three dimensional models predict  
437 mechanisms behind some of the responses observed in mesophyll conductance to CO<sub>2</sub>  
438 ( $g_m$ ) (Tholen & Zhu, 2011).

439

440 Implications of broken assumptions – where is C<sub>i</sub>?

441 Most of the assumptions listed above essentially relate to meaning of stomatal  
442 conductance—source of transpiration, diffusion path, behavior and diffusive capacity of  
443 stomata. While cuticular CO<sub>2</sub> movement is very small and probably negligible in  $A_{net}$   
444 considerable cuticular water loss occurs in transpiration, and so  $g_{sw}$  should include  $g_{cw}$ .  
445 Because stomatal and cuticular transpiration occur in parallel cuticle conductance is  
446 additive to stomatal conductance as (Fig. 2a):



447

$$448 \quad g_{sw} = g_{sw}' + g_{cw} \quad \text{Eq. 9}$$

449

450 where  $g_{sw}$  is what we calculate according to Eq. 2 where  $E$  includes stomatal and  
451 cuticular transpiration whereas  $g_{sw}'$  accounts for only stomatal transpiration. Eq. 9  
452 shows that the  $g_{sw}$  is overestimated by  $g_{cw}$  (Fig. 2a). Also, the effect of  $g_{cw}$  on the  
453 calculation is expected to be greater with the larger  $g_{cw}$  and smaller  $g_{sw}'$ , both of which  
454 increase the proportion of  $g_{cw}$  to  $g_{sw}$ .

455

456 Parkhurst (1994) and co-workers suggested  $C_i$  as we calculate it is better represented  
457 by  $C_{i,s}$  for  $C_i$  at the stomatal cavity based on the calculations used (Fig. 2a). Parkhurst  
458 (1994) predicted that the degree of  $C_i$  over-estimation relative to the average  $C_i$  would  
459 be greater for hypostomatous leaves rather than amphistomatous leaves, and further  
460 argues that even dual-sided gas exchange measurements can only measure  $C_{i,s}$ , the  
461 average  $C_i$ . However, calculated  $C_i$  could be deeper than they assumed. Diffusion path  
462 of  $g_{sw}$  affects location of  $C_i$  and is potentially complicated because where a  $W_i$  gradient  
463 occurs and where  $W_i$  is saturated (100% RH) might change with microenvironment and  
464 water status in leaves. To disentangle these effects, it is helpful to find 100% RH within  
465 the leaf because it defines the starting point of  $g_{sw}$  as well as the end point of  $g_{sc}$  which  
466 sets the location of  $C_i$ . In Fig. 2a, stomatal conductance to  $\text{CO}_2$  ( $g_{sc}$ ) for each  $C_i$  site as  
467 well as  $W_i$  are indicated.

468

469 When there is no  $W_i$  gradient and the  $\Psi_{m,apo}$  is zero, sub-stomatal cavity may be  
470 saturated (center of Fig. 2a). In this scenario,  $C_i$  would be calculated as  $C_{i,s}$  with the  $g_{sc}$   
471 accounting only stomatal path ( $g_{sc} = g_{sc}'$ ). We note that the substomatal cavity may not  
472 be saturated if the cuticle extends into the substomatal cavity as it does for  
473 *Tradescantia virginiana* (Nonami et al. 1991). When the  $W_i$  gradients exist and the  $\Psi$  is  
474 zero, 100% RH may be found at the mesophyll cell surface (left hand side of Fig. 2a).  
475 Now, the calculated  $C_i$  would indicate the  $C_{i,ias}$  with the  $g_{sc}$  accounting for the stomatal  
476 plus intercellular pathway from the stomatal cavity to the mesophyll cell surface ( $\frac{1}{g_{sc}} =$



477  $\frac{1}{g_{sc'}} + \frac{1}{g_{ias}}$ ). When the  $\Psi_{m,apo}$  is negative (right hand side of Fig. 2a), 100% RH may be  
478 within the mesophyll cell. In this case, the  $g_{sc}$  partially includes CO<sub>2</sub> diffusion path in the  
479 liquid phase in addition to the air phase ( $\frac{1}{g_{sc}} = \frac{1}{g_{sc'}} + \frac{1}{g_{ias}} + \frac{1}{g_{liq}}$ ), and the  $C_i$  would be  
480 calculated as  $C_{i,liq}$ . The  $C_{i,liq}$  would be located in the liquid path from the cell wall surface  
481 ( $C_{i,ias}$ ) to chloroplast stroma ( $C_c$ ) depending on where the assumed  $W_i$  is located.  
482 Importantly,  $g_{ias}$  and  $g_{liq}$  usually resides in the mesophyll conductance ( $g_m$ ) as (Evans et  
483 al., 2009):

484  
485 
$$\frac{1}{g_m} = \frac{1}{g_{ias}} + \frac{1}{g_{liq}} \quad \text{Eq. 10}$$

486  
487 where  $g_m$  is defined as:

488  
489 
$$g_m = \frac{A_{net}}{C_i - C_c} \quad \text{Eq. 11}$$

490  
491 Clearly,  $g_m$  is affected by  $g_{cw}$  and  $W_i$  which break the assumptions of  $g_{sc} = g_{sc}'$  (i.e.,  $C_i =$   
492  $C_{i,s}$ , the  $C_i$  in the substomatal cavity). If  $g_{ias}$  is included in  $g_{sc}$  when saturated  $W_i$  occurs  
493 at the mesophyll cell surface, calculated  $C_i$  would be  $C_{i,ias}$  rather than  $C_{i,s}$  and  $g_m$  might  
494 be calculated to be strictly liquid-phase conductance ( $g_m = g_{liq}$ ). Furthermore, some  
495 portion of  $g_{liq}$  is mis-assigned to  $g_{sc}$  as the  $\Psi_{apo}$  'pulls' the  $C_{i,liq}$  deeper into the mesophyll  
496 cells ( $g_{liq}$  error in Fig. 2b). Consequently, decreasing the path-length for CO<sub>2</sub>  
497 overestimates the apparent  $g_m$  (Eq. 10. Even if sub-stomatal  $W_i$  is saturated, the vapor  
498 pressure difference between air and leaf ( $VPD_{leaf}$ ) may 'push' the  $W_i$  deeper into the  
499 airspace by making the  $W_i$  gradients steeper (Fig. 2c). Then,  $g_m$  would also be  
500 overestimated by reducing some portion of path-length in the airspace ( $g_{ias}$  error in Fig.  
501 2c). These 'pushing' and 'pulling' effect can happen either independently or  
502 simultaneously or in coordinated manner when environmental water demand is  
503 excessive (e.g., under drought). We can see by this illustration that only under very  
504 specific circumstances can our current assumptions about  $W_i$  provide us with 'true'  $g_s$ ,  
505  $C_i$ , and  $g_m$ .

506

507 In the following sections, we model the implications when some of these assumptions  
508 fail, reinterpret data from the literature in several case studies on mesophyll  
509 conductance and the photosynthetic CO<sub>2</sub> response, and propagate different rates of  
510 cuticular water loss,  $W_i$  gradients, and unsaturation through the data.

511

512 *Modeling the implications of cuticle conductance*

513

514 *Re-calculations of  $C_i$ , intrinsic water use efficiency, mesophyll conductance*

515 Analogous to Eq. 5,  $C_i$  was recalculated ( $C_{i,cuticle}$ ) with the actual  $g_{sw}$  in Eq. 9 as:

516

517 
$$C_{i,cuticle} = C_a - 1.6 \frac{A_{net}}{g_{sw}'} = C_a - 1.6 \frac{A_{net}}{g_{sw} - g_{cw}} \quad \text{Eq. 12}$$

518

519 For  $C_a$ , we assumed infinite boundary layer conductance as most papers do not report  
520 enough information to recalculate or extract boundary layer conductance and gas  
521 exchange chambers are designed to minimize boundary layers. In Eq. 12, we also  
522 assumed that cuticle conductance for CO<sub>2</sub> was negligible ( $g_{cc} = 0$ ) because the effect of  
523 the  $g_{cc}$  on the  $A_{net}$  has been often undetectably small under experimental  $C_a$  levels  
524 (Boyer et al., 1997; Tominaga et al., 2018).

525

526 To propagate  $g_{cw}$  through the modeling, we fixed  $g_{cw}$  as a proportion of stomatal  
527 conductance ( $0, 1 \times 10^{-5}, 1 \times 10^{-4}, 1 \times 10^{-3}, 1 \times 10^{-2}, 5 \times 10^{-2}, 1 \times 10^{-1},$  and  $2.5 \times 10^{-1}$ ) at  
528 the lowest light intensity for light response curves (see below), 25 °C for temperature  
529 response curves (see below), and 400  $\mu\text{mol mol}^{-1}$  CO<sub>2</sub> for the CO<sub>2</sub> response curves  
530 (see below).

531

532 Introducing  $g_{cw}$  into a gas exchange approach to plant water balance has implications  
533 for how we define water use efficiency, as we can partition out stomatal and cuticular  
534 water use efficiencies. By separating out cuticle and stomatal water loss components,  
535 we can better understand the immediate cause as to why plants vary in water use  
536 efficiency (i.e. stomatal versus cuticular components). This partitioning could then be

537 used to inform crop breeding for further enhancing water use efficiency. We  
 538 recalculated intrinsic water use efficiency (*iWUE*) as:

539

$$540 \quad iWUE_s = \frac{A_{net}}{g_{sw'}} \quad \text{Eq. 13}$$

541

542 where *iWUE<sub>s</sub>* is intrinsic stomatal water use efficiency, ( $\mu\text{mol CO}_2 \text{ mol}^{-1} \text{ H}_2\text{O}$ ). To  
 543 calculate the effects of including cuticular conductance on water use efficiency, we used  
 544 a representative steady-state *A-C<sub>i</sub>* curve for *Populus deltoides* from Stinziano *et al.*  
 545 (2017) and we propagated *g<sub>cw</sub>* as a proportion of *g<sub>sw</sub>* at a reference [CO<sub>2</sub>] of 400  $\mu\text{mol}$   
 546  $\text{mol}^{-1}$ . For this propagation, we recalculated *g<sub>sc</sub>* according to the standard procedure (Li-  
 547 Cor, 2019):

548

$$549 \quad g_{sc} = \frac{1}{(1+K)\left(\frac{1.6}{g_{sw}}\right) + \frac{1.37}{g_{bw}}} + \frac{K}{(1+K)\left(\frac{1.6}{g_{sw}}\right) + K\frac{1.37}{g_{bw}}} \quad \text{Eq. 14}$$

550

551 where *K* is the ratio of stomata on the adaxial to the abaxial surface of the leaf  
 552 (assumed to be equal to 1), and *g<sub>bw</sub>* is the boundary layer conductance to water.  
 553 Accounting for cuticular conductance in the calculations of water use efficiency leads to  
 554 an increase of up to 20% in *iWUE* when cuticular conductance is high (Fig. 3).

555

556 *Implications of cuticular conductance on the interpretation of mesophyll conductance*  
 557 *data*

558 *g<sub>m</sub> Calculations*

559 Since *C<sub>c</sub>* is also dependent on *C<sub>i</sub>*, we need to set out *a priori* predictions of how changes  
 560 in *C<sub>i</sub>* would affect *C<sub>c</sub>*. To predict this effect, we started with the equation describing the  
 561 online isotope discrimination from (Farquhar *et al.*, 1982) as modified by (Wingate *et al.*,  
 562 2007):

563

$$564 \quad {}^{13}\Delta = a_b \frac{c_a - c_s}{c_a} + a \frac{c_s - c_i}{c_a} + (b_s + a_w) \frac{c_i - c_c}{c_a} + b \frac{c_c}{c_s} - f \frac{\Gamma^*}{c_a} - (e + e^*) \frac{R_d}{k c_a} \quad \text{Eq. 15}$$

565

566 where  $^{13}\Delta$  is the predicted net  $^{13}\text{C}$  discrimination,  $a_b$  is the  $^{13}\text{C}$  fractionation due to  
 567 diffusion through the boundary layer,  $a$  is the  $^{13}\text{C}$  fractionation due to diffusion through  
 568 the stomata,  $b_s$  is the  $^{13}\text{C}$  fractionation due to  $\text{CO}_2$  solubilization,  $a_w$  is the  $^{13}\text{C}$   
 569 fractionation during diffusion in water,  $b$  is net  $^{13}\text{C}$  fractionation during carboxylation by  
 570 rubisco and PEP carboxylase,  $f$  is the  $^{13}\text{C}$  fractionation due to photorespiration,  $e$  is the  
 571  $^{13}\text{C}$  fractionation due to decarboxylation,  $e^*$  is apparent  $^{13}\text{C}$  discrimination during  
 572 decarboxylation,  $k$  is carboxylation efficiency,  $\Gamma^*$  is the photorespiratory  $\text{CO}_2$   
 573 compensation point, and  $R_d$  is the rate of respiration in the dark. Note that for the sake  
 574 of simplicity, we ignore all ternary interactions here (Farquhar and Cernusak, 2012) as it  
 575 becomes an unnecessarily complex for demonstrating the reliance of  $g_m$  on  $C_i$  for this  
 576 review (see below). We can rearrange this for  $C_c$  to obtain:

577

$$578 \quad C_c = \frac{C_a(^{13}\Delta - a_b) + C_s(a_b - a) + C_i(a - b_s - a_w) + (e + e^*)\frac{R_d}{k} - f\Gamma^*}{b - b_s - a_w} \quad \text{Eq. 16}$$

579

580 Now suppose we have  $C_{i,standard}$  and  $C_{i,cuticle}$ , and want to calculate the difference  
 581 between  $C_{c,standard}$  ( $C_c$  determined without  $g_c$ ) and  $C_{c,cuticle}$ . By calculating the difference,  
 582 most terms in the above Eq. cancel out (even the term with  $k$ , which should be the same  
 583 in theory; see Appendix A for details), leaving us with:

584

$$585 \quad C_{c,standard} - C_{c,cuticle} = \frac{a - b_s - a_w}{b - b_s - a_w} (C_{i,standard} - C_{i,cuticle}) \quad \text{Eq. 17}$$

586

587 Which can be further rearranged to:

588

$$589 \quad \frac{C_{c,standard} - C_{c,cuticle}}{C_{i,standard} - C_{i,cuticle}} = \frac{a - b_s - a_w}{b - b_s - a_w} \quad \text{Eq. 18}$$

590

591 In this way, the difference in  $C_c$  can be calculated using a ratio of fractionation constants  
 592 and the difference in  $C_i$ . Since  $a$  is typically assumed to be 4.4 ‰,  $b_s$  is assumed to be  
 593 1.1 ‰ at 25 °C (Vogel, 1980),  $a_w$  is assumed to be 0.7 ‰, and  $b$  is assumed to be  
 594 between 27 and 30 ‰, then the difference in  $C_c$  values should be between 9.2 and 10.3

595 % of the difference in  $C_i$  values at 25 °C. For the  $g_m$  calculations, we took a conservative  
 596 approach and assumed that the difference in  $C_c$  was 9.2% of the difference in  $C_i$  values.

597

598 Including the ternary effects from Farquhar and Cernusak (2012) makes *a priori*  
 599 predictions of the effect of cuticle conductance on  $C_c$  more difficult. Describing the  
 600 discrimination:

601

$$602 \quad {}^{13}\Delta = \frac{1}{1-t} \left[ a_b \frac{C_a - C_s}{C_a} + a \frac{C_s - C_i}{C_a} \right] + \frac{1+t}{1-t} \left[ (b_s + a_w) \frac{C_i - C_c}{C_a} + b \frac{C_c}{C_s} - f \frac{\Gamma^*}{C_a} - (e + e^*) \frac{R_d}{kC_a} \right] \quad \text{Eq. 19}$$

603

604 Where  $t$  is the ternary term described by:

605

$$606 \quad t = \frac{\left[ 1 + \frac{a_b(C_a - C_s) + a(C_s - C_i)}{C_a - C_i} \right]}{2g_{ac}} E_s \quad \text{Eq. 20}$$

607

608 Where  $g_{ac}$  is the total conductance to  $\text{CO}_2$  diffusion. Note that  $C_i$ ,  $E_s$ , and  $g_{ac}$  all need to  
 609 be corrected for  $g_{sw}$  and  $g_c$  occurring in parallel. Since  $g_c$  affects nearly every  
 610 component of  $t$ , calculations using  $^{13}\text{C}$  discrimination may be highly sensitive to  $g_c$  when  
 611 considering ternary interactions. However, if we assume a  $C_a$  of 400  $\mu\text{mol mol}^{-1}$ ,  $g_{bw}$  of 2  
 612  $\text{mol m}^{-2} \text{s}^{-1}$ ,  $g_{sw}$  of 0.15  $\text{mol m}^{-2} \text{s}^{-1}$ , leaf-to-air vapor pressure deficit of 1.0 kPa,  $A_{\text{net}}$  of 15  
 613  $\mu\text{mol m}^{-2} \text{s}^{-1}$ ,  $t$  changes value from 2.6547 in the case of no cuticle conductance up to  
 614 2.659 in the case where 10% of  $g_{sw}$  is attributed to cuticle conductance. Thus, the  
 615 ternary calculations may be minimally sensitive to cuticle conductance. We can  
 616 rearrange Eq. 20 for  $C_c$ :

617

$$618 \quad C_c = \frac{a \frac{C_s - C_i}{C_a(1-t)} - a_b \frac{C_s}{C_a(1-t)} - (e + e^*) \frac{R_d(1+t)}{kC_a(1-t)} - f \frac{\Gamma^*(1+t)}{C_a(1-t)} + \frac{C_i(1+t)(b_s + a_w)}{C_a(1-t)} + \frac{a_b}{1-t} - {}^{13}\Delta}{\frac{(1+t)(b_s + a_w)}{C_a(1-t)} - \frac{b(1+t)}{C_s(1-t)}} \quad \text{Eq. 21}$$

619

620 We can see that the effect of cuticle conductance affects nearly every term in the  
 621 equations. And solving for the difference between  $C_c$  without cuticle conductance ( $C_{c,s}$ )  
 622 and with cuticle conductance ( $C_{c,c}$ ) we get (See Appendix B for derivation):

623

$$C_{c,s} - C_{c,c} = \frac{a[(C_s - C_{i,s})(1+t_c) - (C_s - C_{i,c})(1+t_s)] + [a_b C_a - a_b C_s - 2^{13} \Delta C_a][t_c - t_s] + (b_s + a_w)(1+t_s)(1+t_c)[C_{i,s} - C_{i,c}]}{(1+t_s)(1+t_c)[b_s + a_w - \frac{b C_a}{C_s}]}$$

625 Eq. 22

626

627 where  $C_{i,s}$  is  $C_i$  without cuticle conductance,  $C_{i,c}$  is  $C_i$  accounting for cuticle  
 628 conductance,  $t_s$  is the ternary equation without cuticle conductance, and  $t_c$  is the ternary  
 629 equation with cuticle conductance. For the purposes of this review, however, we have  
 630 not included the ternary effects into our modeling.

631

### 632 *Reinterpreting gm data*

633 We reinterpreted  $g_m$  by propagating a  $g_{cw}$  into the  $g_{sw}$  data through recalculating  $C_i$  from  
 634 Eq. 12 and  $g_m$  from Eq. 11. We fixed  $g_{cw}$  as a proportion of stomatal conductance (0, 1  
 635  $\times 10^{-5}$ ,  $1 \times 10^{-4}$ ,  $1 \times 10^{-3}$ ,  $1 \times 10^{-2}$ ,  $5 \times 10^{-2}$ ,  $1 \times 10^{-1}$ , and  $2.5 \times 10^{-1}$ ) at the lowest light  
 636 intensity for light response curves (see below), 25 °C for temperature response curves  
 637 (see below), and 400  $\mu\text{mol mol}^{-1} \text{CO}_2$  for the  $\text{CO}_2$  response curves (see below).

638 For reinterpreting the  $g_m$  temperature response data from Scafaro et al. (2011), we  
 639 included temperature response functions of  $g_{cw}$  obtained from Riederer and Schreiber  
 640 (2001) fitting an Arrhenius equation on either side of the breakpoint in the Arrhenius  
 641 plot:

642

$$g_{cw} = g_{cw,base} e^{\frac{E_a(T-298)}{298RT}} \quad \text{Eq. 23}$$

644

645 where  $g_{cw,base}$  was determined as above, the highest and lowest  $E_a$  ( $25,215 \text{ J mol}^{-1}$  with  
 646 a breakpoint at 35 °C to  $85,171 \text{ J mol}^{-1}$ ;  $20,145 \text{ J mol}^{-1}$  with a breakpoint at 30 °C to  
 647  $69,856 \text{ J mol}^{-1}$ , respectively) from Riederer and Schreiber (2001) were used,  $T$  is the  
 648 leaf temperature in K, and  $R$  is the universal gas constant ( $8.314 \text{ J mol}^{-1} \text{ K}^{-1}$ ). For  $g_m$   
 649 light response data, we calculated  $g_{cw}$  based on the  $g_a$  data from the lowest light  
 650 intensity to minimize issues with  $g_{cw}$  exceeding  $g_a$ . In nearly all cases,  $g_{cw}$  substantially  
 651 affected  $g_m$ , with notable changes occurring when  $g_c$  exceeds  $\sim 1\%$  of  $g_s$  (Fig. 4b, d, f).  
 652 In regard to environmental responses of  $g_m$ , light and temperature responses are much

653 more sensitive to  $g_{cw}$  than  $CO_2$  response (Fig. 4b, d, f). It is important to note that  $g_m$   
654 appears most sensitive to  $g_{cw}$  for  $C_i < 500 \mu\text{mol mol}^{-1}$ .

655

### 656 *Reinterpreting A-C<sub>i</sub> data*

657 We used a representative steady-state A-C<sub>i</sub> response from *Populus deltoides* (Stinziano  
658 *et al.*, 2017). A-C<sub>i</sub> data were recalculated by assuming: 1) constant  $g_{cw}$  across all  $C_i$ , and  
659 2)  $g_{cw}$  was 0 to 25% (in increments of 0.1%) of  $g_{sw}$  at  $C_a$  of  $400 \mu\text{mol mol}^{-1}$ . All A-C<sub>i</sub>  
660 curves were fit using the ‘bilinear’ approach (which treats the FvCB model as a change-  
661 point model during curve fitting similar to Gu *et al.*, 2010) of the {plantecophys} package  
662 in R (Duursma, 2015). For species that had temperature response curve measured, we  
663 fit the modified Arrhenius model to the maximum Rubisco carboxylation ( $V_{cmax}$ ) and  
664 maximum electron transport ( $J_{max}$ ) rates.

665

666 Accounting for cuticle conductance causes a decrease in the calculated value of  $C_i$ ,  
667 such that current calculations methods are systematically overestimating  $C_i$  (Fig. 4a, c,  
668 e). These differences are least pronounced for A-C<sub>i</sub> curve data (Fig. 4c), and most  
669 pronounced for temperature response data. In some instances, the  $C_i$  calculations  
670 breakdown when  $g_{cw}$  approaches the value of  $g_{sw}$ . Accounting for  $g_{cw}$  alters the shape of  
671 the A-C<sub>i</sub> response, and increases fitted values for  $V_{cmax}$  and  $J_{max}$ , although differences  
672 appear negligible until  $g_{cw}$  is ~1% of  $g_{sw}$  (Fig. 5). In light of the interpretations of  
673 Parkhurst (1994), we modelled the impact of combined  $CO_2$  gradients and cuticle  
674 conductance on the perceived A/C<sub>i</sub> response.

675

### 676 *Modeling $g_{ias}$ and $W_i$ effects on gas exchange parameters*

677 Considering the Eq. describing the surface to intercellular  $CO_2$  concentration gradient:

678

$$679 A_{net} = g_{sc}(C_s - C_i) \quad \text{Eq. 24}$$

680

681 where  $g_{sc}$  is stomatal conductance to  $CO_2$ ,  $C_s$  is the  $CO_2$  concentration at the leaf  
682 surface, and  $C_i$  is intercellular airspace  $CO_2$  concentration. Eq. 24 can misrepresent the  
683 process, which according to Parkhurst (1994) would be:

684

$$685 \quad A_{net} = g_{sc}(C_s - C_{i,es}) = g_{ias}(C_{i,es} - C_{ias}) \quad \text{Eq. 25}$$

686

687 where  $C_{i,es}$  is the  $\text{CO}_2$  concentration at the site of evaporating surfaces,  $g_{ias}$  is the  
688 conductance of  $\text{CO}_2$  from the evaporative surfaces to the intercellular airspace, and  $C_{ias}$   
689 is the concentration of  $\text{CO}_2$  in the intercellular airspace. Note that under the Parkhurst  
690 (1994) definition,  $C_{ias}$  could represent a point anywhere in the intercellular airspace,  
691 while  $C_{i,es}$  is assumed to be closer to the substomatal cavity than  $C_{ias}$ . If the  
692 evaporating surface is at the mesophyll cell surface, then Eq. 25 would have to account  
693 for this reversed order and be re-written as:

694

$$695 \quad A_{net} = g_s(C_s - C_{ias}) = g_{ias}(C_{ias} - C_{es}) \quad \text{Eq. 26}$$

696

697 Furthermore,  $g_s$  needs to be corrected for cuticular conductance. Therefore, we can  
698 describe the conductance of  $\text{CO}_2$  and water from the leaf surface to the intercellular  
699 airspace ( $g_{s,ias}$ ) according to:

700

$$701 \quad g_{s,ias} = \frac{1}{\frac{1}{g_s - g_c} + \frac{1}{g_{ias}}} \quad \text{Eq. 27}$$

702

703 We can further include mesophyll conductance,  $g_m$ , to calculate total conductance of  
704  $\text{CO}_2$  and water from the leaf surface to the chloroplast ( $g_t$ ):

705

$$706 \quad g_t = \frac{1}{\frac{1}{g_s - g_c} + \frac{1}{g_{ias}} + \frac{1}{g_m}} \quad \text{Eq. 28}$$

707

708 We can then model the implications of  $g_c$  and  $g_{ias}$  on  $C_i$  by varying their values. We  
709 linked Eq. 28 to a leaf-level model of photosynthesis:

710

$$711 \quad A_{net} = V_{cmax} \frac{C_c - \Gamma^*}{C_c + K_c \left(1 + \frac{O_c}{K_o}\right)} - R \quad \text{Eq. 29}$$

712



713 
$$A_{net} = J \frac{C_c - \Gamma^*}{4C_c - 8\Gamma^*} - R \quad \text{Eq. 30}$$

714

715 
$$(J - 0.5\alpha I)(J - J_{max}) = 0 \quad \text{Eq. 31}$$

716

717 where  $V_{cmax}$  is maximum rate of Rubisco carboxylation,  $O_c$  is the oxygen concentration  
718 in the chloroplast ( $210 \text{ mmol mol}^{-1}$ ),  $K_c$  is the Michaelis-Menten constant for Rubisco  
719 carboxylation,  $K_o$  is the Michaelis-Menten constant for Rubisco oxygenation,  $J_{max}$  is the  
720 maximum rate of electron transport,  $J$  is the rate of electron transport,  $\alpha$  is the proportion  
721 of irradiance ( $I$ ) absorbed by the leaf,  $R$  is respiration, and  $\Gamma^*$  is the photorespiratory  
722  $\text{CO}_2$  compensation point. All values (except for  $V_{cmax}$  and  $J_{max}$ ) were obtained from  
723 Bernacchi *et al.* (2001).

724

725 We assumed a  $V_{cmax}$  and  $J_{max}$  of 100 and 200, respectively, and modelled under light  
726 saturating conditions such that  $J = J_{max}$ . We modelled from a  $C_s$  of 50 to 2000 in 50 ppm  
727 intervals. For calculating  $E_s$  (to represent the 'measured' transpiration from a gas  
728 exchange cuvette) we used the following equation:

729

730 
$$E_s = g_{sw} \frac{W_i - W_s}{P} \quad \text{Eq. 32}$$

731

732 where  $E_s$  is stomatal transpiration,  $g_{sw}$  is stomatal conductance (ranging from 0.03 to  
733  $2.00 \text{ mol m}^{-2} \text{ s}^{-1}$ ),  $W_i$  is the water concentration inside the leaf (assumed to be 100%  
734 saturation vapor pressure for this initial calculation, which was calculated according to  
735 Cernusak *et al.*, 2018),  $W_s$  is the water vapor concentration at the leaf surface  
736 (assumed to be 50% saturation vapor pressure), and  $P$  is atmospheric pressure  
737 (assumed to be 100 kPa). We assumed leaf temperature was equal to air temperature  
738 of 298 K. Once  $E_s$  was calculated, we then altered our assumptions about  $W_i$ , changing  
739 it to 99% and 90% of saturation vapor pressure. Then for each different  $W_i$  scenario, we  
740 set  $g_{cw}$  to either 0 or 0.01, and  $g_{ias}$  to either 1.00 (Mott, 1988) or infinity. The  $C_i$  obtained  
741 when  $W_i = 100\%$  saturation vapor pressure,  $g_{cw} = 0$  and  $g_{ias} = \text{infinity}$  was used as the  
742 reference  $C_i$ .  $A_{net}$  was then modelled to obtain  $A/C_i$  responses (using both reference  $C_i$

743 and the  $C_i$  obtained from each combination of  $W_i$ ,  $g_{cw}$  and  $g_{ias}$ ) which were then fit using  
744 {plantecophys} (Duursma, 2015) in R (R Core Team, 2018) to obtain  $V_{cmax}$  estimates.

745

746 Modeling the effects of  $g_{cw}$  and  $g_{ias}$  across a range of reference  $g_{sw}$  (i.e. the  $g_s$   
747 'measured' using a typical open-flow gas exchange system), we see that  $g_c$  has the  
748 greatest impact at low  $g_{sw}$ , with a negligible effect when  $g_{cw}/g_{sw} < 1\%$  at a  $C_s$  of 400 ppm  
749 (Fig. 6). Finite  $g_{ias}$ , however, has a much larger impact on  $C_i$ , with its effect size  
750 increasing with  $g_{sw}$  (Fig. 6). This explains the  $C_i$  discrepancies observed in Table 1—  
751 larger discrepancy with low  $g_{sw}$  and smaller discrepancy with high  $g_{sw}$ . It is also possible  
752 that the discrepancies relate to  $C_{ias}$  being directly measured deeper in the intercellular  
753 airspace than the location of the evaporating surface such that the calculated  $C_i$  is  $C_{i,es}$   
754 and the differences are due to how the quantities are defined. In the case of leaves  
755 treated with ABA (e.g. Boyer 2015a,b; Tominaga & Kawamitsu, 2015a) or stress  
756 induced stomatal closure,  $g_{cw}$  could account for the majority of the impact, since the limit  
757 of the  $CO_2$  gradient-related deviation in calculated and real  $C_i$  tends towards 0 as  
758 measured  $g_{sw}$  approaches 0. Looking at  $W_i$ , the impact of  $W_i$  assumptions is evident. A  
759 1% reduction in  $W_i$  increases the  $C_i$  discrepancy by a few ppm (Fig. 6b), and a 10%  
760 reduction causes changes the discrepancy by over 20 ppm in some cases (Fig. 6c).

761

762 If we fit  $A/C_i$  curves in the presence of  $g_{cw}$  and finite  $g_{ias}$  and use the Moss & Rawlins  
763 (1963) assumptions,  $g_c$  has a relatively small impact on  $V_{cmax}$ , but is important in cases  
764 where  $g_{cw} > 5\%$  of  $g_s$ , while  $g_{ias}$  causes a large depression in  $V_{cmax}$  across all  $g_{sw}$  used in  
765 simulations (Fig. 6g, h, i). As vapor pressure in the leaf is reduced from 100%,  $V_{cmax}$   
766 estimates increase (Fig. 6g, h, i). Interestingly, with  $g_{cw} > 0$ ,  $g_{ias} < \infty$ , internal vapor  
767 pressure < saturation vapor pressure and high  $g_{sw}$ ,  $V_{cmax}$  estimations are close to the  
768 value used in the model (Fig. 6i). Based on these modeling analyses, the impact of finite  
769  $g_{ias}$  may be of greater concern when estimating gas exchange parameters than  $g_c$ , and  
770 many of the large  $g_c$  values reported using  $C_i$  differentials between calculated and  
771 measured values may in fact be partially attributed to a finite  $g_{ias}$ . It is crucial to note,  
772 however, that cuticle water fluxes have been reported up to 65% of total water flux  
773 across a leaf (Šantrůček et al., 2004), and the relative influence of  $g_{ias}$  and  $g_{cw}$  depend

774 on the relative value of  $g_{sw}$ . Given our modeling results showing the different impact of  
775  $g_{cw}$  and  $g_{ias}$  on gas exchange data, it may be possible to construct a model capable of  
776 estimating  $g_{cw}$  and  $g_{ias}$  from a data set. This would allow proper attribution of  $C_i$   
777 differentials to  $g_{cw}$  versus  $g_{ias}$ .

778

779 Given the impact when all three assumptions test above are violated, it is possible that  
780 many (or even most) estimates of apparent  $V_{cmax}$  in the literature may still be 'correct' for  
781 the wrong reasons. However, we would like to note important assumptions made in our  
782 modeling: 1) resistances within the leaf are additive (which may not hold; Parkhurst,  
783 1984), 2) Fickian (rather than Knudsen, which may occur; Dacey, 1987) diffusion  
784 governs gas diffusion from outside to inside the leaf, 3) the leaf is treated one-  
785 dimensionally rather than three-dimensionally (which will affect calculations: Parkhurst,  
786 1977; Earles et al., 2018), 4) the air pressure differential from outside to inside the leaf  
787 is 0 (evidence suggested this may not be correct, at least in the extreme case of lotus,  
788 *Nelumbo*; Leuning, 1983; Dacey, 1987).

789

790

### 791 *Solving the failed assumption*

#### 792 *When does it (not) work?*

793 Cuticular conductance has largely been assumed negligible and is often ignored in gas  
794 exchange measurements, while  $CO_2$  gradients are largely ignored - however this may  
795 be due to partitioning  $g_{ias}$  into  $g_m$  (Evans et al. 1994), reducing the need to consider  $g_{ias}$   
796 when  $C_i$  is taken as  $C_{i,es}$ . To date, many of the Moss and Rawlins (1963) assumptions  
797 have been shown to be incorrect in at least some cases (e.g. Hygen, 1951, 1953;  
798 Slavik, 1958; Jarvis & Slatyer, 1970; Leuning, 1983; Parkhurst, 1984; Ward & Bunce,  
799 1986; Dacey, 1987; Egorov & Karpushkin, 1988; Long et al., 1989; Karpushkin, 1994;  
800 Boyer et al., 1997; Meyer and Genty, 1998; Šantrůček et al., 2004; Canny & Huang,  
801 2006; Boyer 2015a; Boyer, 2015b; Tominaga and Kawamitsu, 2015a; Cernusak et al.,  
802 2018; Tominaga et al., 2018, Cernusak et al. 2019). We summarize the assumptions  
803 and their expected impact on  $C_i$  calculations in Fig. 8. However, it is important to note

804 that the assumptions have allowed major breakthroughs in our understanding of plant  
805 physiology.

806

807 Our analysis of the effects of  $g_{cw}$  on gas exchange measurements suggests that  $C_i$  is  
808 relatively unaffected when  $g_{cw}$  is less than 1% of  $g_{sw}$  across a range of irradiance,  $[CO_2]$ ,  
809 and temperature, and has a relatively minor effect on fitted values of  $V_{cmax}$  and  $J_{max}$ .  
810 Given that most values of  $g_{cw}$  measured to date are relatively low, and assuming  $g_{cw}$   
811 was measured correctly, it is likely below the 1% threshold in unstressed plants,  
812 especially crops (Table 2; Schuster *et al.*, 2017), this would explain why the Moss and  
813 Rawlins (1963) assumption that  $g_{cw} = 0$  has been successful in advancing our  
814 understanding of photosynthesis over the past six decades. In regard to  $g_m$ , accounting  
815 for  $g_{cw}$  increases the value of  $g_m$ , however such effects are small across irradiance and  
816  $[CO_2]$  when  $g_{cw}$  is at or below 1%  $g_{sw}$  but become particularly important for the  
817 temperature response of mesophyll conductance. When  $g_{cw}$  exceeds 1% of  $g_{sw}$ , the  
818 calculations for mesophyll conductance broke down for the modeling, giving extremely  
819 high and/or negative values for  $g_m$ , which is related to  $C_{i,cuticle}$  dropping close to or below  
820  $C_c$ . Pons *et al.* (2009) recommended accounting for  $g_{cw}$  in  $g_m$  measurements, and our  
821 modeling suggests that this is critical when looking at the temperature response of  $g_m$ ,  
822 and in cases where  $g_{cw}$  is very high relative to  $g_{sw}$ . We may thus expect significant  
823 errors in gas exchange calculations when  $g_{sw}$  is low (i.e. low light, drought, and high  
824 VPD conditions), and/or when  $g_{cw}$  is high (i.e. high temperature, well-watered plants).  
825 Furthermore, considering chlorophyll fluorescence-based estimates of  $g_m$  (i.e. Harley *et al.*  
826 *et al.*, 1992), sensitivity of  $g_m$  should be similar to the isotopic method as it is calculated via  
827 Eq. 23, with the added caveat that  $C_c$  becomes sensitive to the estimate of the  
828 photorespiratory  $CO_2$  compensation point ( $\Gamma^*$ ). Since  $\Gamma^*$  can be estimated from gas  
829 exchange or Rubisco kinetics, the sensitivity of calculated  $g_m$  to  $g_{cw}$  via the variable  $J$   
830 method will depend on how  $\Gamma^*$  is measured. In this regard, interpreting data from  
831 drought and temperature stress experiments should proceed with caution if  $g_{cw}$  is  
832 ignored.

833

834 CO<sub>2</sub> gradients within leaves have ontological consequences for gas exchange  
835 measurements, in particular, the meaning of C<sub>i</sub> (Parkhurst, 1994). If typical C<sub>i</sub> estimates  
836 are taken to be C<sub>i,es</sub> measurements, then the implications of a finite g<sub>ias</sub> on data derived  
837 from the C<sub>i</sub> estimates are minimal, since g<sub>ias</sub> is often subsumed into g<sub>m</sub> (Evans et al.,  
838 1994). If C<sub>i,es</sub> occurs at the surface of the mesophyll cells, then g<sub>ias</sub> will have no impact  
839 on C<sub>i</sub> estimates since the g<sub>sw</sub> calculation occurs at the location of the evaporating  
840 surface (Parkhurst, 1994). However, if the C<sub>i,es</sub> is located closer to the stomata than C<sub>ias</sub>  
841 (i.e. if the evaporating surface is not the mesophyll cell surface), C<sub>ias</sub> would then be  
842 located closer to the mesophyll cells than C<sub>i,es</sub>. Our modeling of finite g<sub>ias</sub> represents this  
843 case and demonstrates that the implications of g<sub>ias</sub> on data derived from such C<sub>i</sub>  
844 estimates can be quite large, causing C<sub>i</sub> estimates to differ by >10 μmol mol<sup>-1</sup>, and g<sub>sw</sub>  
845 to be reduced by more than 50% (Fig. 6). To reiterate, subsuming g<sub>ias</sub> into g<sub>m</sub> eliminates  
846 the consequences of g<sub>ias</sub> for 'C<sub>i</sub>' estimates under conditions where C<sub>ias</sub> lies closer to the  
847 mesophyll cells than C<sub>i,es</sub>. If C<sub>i,es</sub> is at the mesophyll cell surface, then g<sub>ias</sub> is already  
848 accounted for in g<sub>sw</sub> calculations. As long as it is recognized that C<sub>i</sub> estimates represent  
849 C<sub>i,es</sub> (Parkhurst, 1994) and that all derived parameters are apparent parameters on a  
850 C<sub>i,es</sub>-basis, g<sub>ias</sub> poses minimal issues to the interpretation of C<sub>i</sub> data. This becomes an  
851 issue however, in cases where the location of the evaporating surface differs between  
852 species or treatment groups (e.g. control versus drought stress). The same would be  
853 true for parameters derived from C<sub>ias</sub> estimates if the rest of g<sub>m</sub> were ignored. Note that  
854 this underscores the importance of knowing the location of the C<sub>i</sub> calculation. However,  
855 it appears that g<sub>ias</sub> has minimal consequences for g<sub>m</sub> relative to g<sub>cw</sub> at low values of g<sub>sw</sub>  
856 (Fig. 7), with g<sub>ias</sub> shifting the g<sub>sw</sub> value at which g<sub>cw</sub> has the greatest impact on g<sub>m</sub>.  
857 Reducing W<sub>i</sub> tends to reduce the impact of g<sub>cw</sub> and g<sub>ias</sub> on g<sub>m</sub> (Fig. 7). We also  
858 calculated the theoretical maximum values for g<sub>ias</sub> based on leaf thicknesses from  
859 Onoda et al. (2011) to estimate diffusion distances, along with biophysical equations to  
860 calculate conductance (Massman, 1998; Campbell & Norman, 1998) (see  
861 Supplementary Methods for more information on the calculations). We calculated that  
862 the median maximum theoretical values of g<sub>ias</sub> for an amphistomatous and  
863 hypostomatous leaf is 24 and 3 mol m<sup>-2</sup> s<sup>-1</sup>, respectively (Fig. 1c).

864

865 So far, the above cases refer to conditions where  $W_i$  is at saturation vapor pressure. in  
866 cases where  $W_i$  is not at saturation vapor pressure inside the leaf (e.g. Cernusak et al.,  
867 2018), the consequences vary with the degree to which the assumption is violated.  $C_i$ ,  
868  $g_{sw}$ , and  $V_{cmax}$  are relatively unaffected when  $W_i$  is at 99% saturation (data not shown;  
869 note that xylem water potential is  $\sim -200$  kPa (Nonami & Boyer, 1987), which would  
870 have a  $W_i$  value of  $\sim 99.85\%$  saturation vapor pressure), however these parameters  
871 become both over- and under-estimated when  $W_i$  reaches 90% saturation depending on  
872 which assumptions are violated (Fig. 6). Thus, it appears that very small violations of  
873 this assumption will have minimal effects on gas exchange parameters. But caution  
874 must be exercised in cases where this assumption is likely to be violated, such as high  
875 vapor pressure deficit conditions, drought stress, and at high temperatures, as  
876 parameters will be overestimated. We note that there could be cases of multiple  
877 assumption violations leading to 'correct' parameters for the wrong reasons (i.e. Figs.  
878 6h,i), although even in these cases other parameters are still different.

879  
880 Based on our modeling, we predict that under conditions where  $g_{sw}$  is low (well-watered,  
881 low light, high  $[CO_2]$ , low vapor pressure deficit, high leaf water potential), cuticular  
882 water loss will be sufficient to cause calculations to overestimate  $C_i$  (Fig. 2). Under  
883 conditions where  $W_i$  is less than expected (drought, high vapor pressure deficit, high  
884 temperature), calculated  $C_i$  values will be lower than the actual  $C_i$  (inside the mesophyll  
885 cells in Fig. 2b). As  $g_{ias}$  becomes increasingly finite, the  $C_i$  estimates will change in  
886 meaning from  $C_{ias}$  to  $C_{i,es}$ , barring violations in the other assumptions. Lastly, under  
887 conditions where  $g_{sw}$  is high,  $g_{cw}$  is minimal,  $g_{ias}$  is very high, and the assumptions of  
888 Moss and Rawlins (1963) hold, then calculated  $C_i$  and measured  $C_i$  should agree.  
889 However, in this last case, the agreement results from  $C_i$  meaning  $C_{ias}$ , which means  
890 that the assumptions behind  $g_m$  measurements need to be adjusted accordingly.

891  
892 Cuticular water loss could be a significant source of water flux across the leaf and has  
893 the potential to undermine the assumptions upon which gas exchange calculations are  
894 based. We urge caution when performing and interpreting measurements of  $g_m$  due to  
895 the potential impact of  $g_{cw}$  on  $g_m$  calculations. More research is needed to assess the

896 magnitude of cuticular water loss across species and climates, however our data  
897 suggest that  $g_{cw}$  must exceed 1% of  $g_{sw}$  to have a substantial impact on photosynthetic  
898 gas exchange. Current information on the  $g_{cw}$  suggests that it may exceed that 1%  
899 threshold on average, depending on the measurement methodology. Combining the  
900 information from Riederer and Schreiber (2001) and Schuster et al. (2017), median  $g_c$   
901 based on all methods was  $1.84 \text{ mmol m}^{-2} \text{ s}^{-1}$  (IQR:  $0.45 - 4.67 \text{ mmol m}^{-2} \text{ s}^{-1}$ , mean:  $2.73$   
902  $\text{mmol m}^{-2} \text{ s}^{-1}$ ), while median  $g_c$  based on permeance was  $0.32 \text{ mmol m}^{-2} \text{ s}^{-1}$  (IQR:  $0.11 -$   
903  $0.90 \text{ mmol m}^{-2} \text{ s}^{-1}$ , mean:  $0.85 \text{ mmol m}^{-2} \text{ s}^{-1}$ ) and  $3.31 \text{ mmol m}^{-2} \text{ s}^{-1}$  (IQR:  $1.58 - 5.91$   
904  $\text{mmol m}^{-2} \text{ s}^{-1}$ , mean:  $3.82 \text{ mmol m}^{-2} \text{ s}^{-1}$ ) based on minimum conductance methods (Fig.  
905 1a). Meanwhile,  $g_{sw}$  from the global datasets of Lin et al. (2015) and Smith and Dukes  
906 (2017) was  $104 \text{ mmol m}^{-2} \text{ s}^{-1}$  (IQR:  $52 - 226 \text{ mmol m}^{-2} \text{ s}^{-1}$ , mean:  $185 \text{ mmol m}^{-2} \text{ s}^{-1}$ ),  
907 suggesting that based on median values, cuticle conductance could range between  
908 0.31 and 3.2 % of  $g_{sw}$  (Fig. 1). Schuster et al. (2017) note that minimum conductance  
909 methods can be biased towards high values if stomata are not completely closed, which  
910 may explain the 10-fold difference in median permeance between the methods. Another  
911 possible explanation for this discrepancy could be related to stretching of the cuticle at  
912 high  $\Psi$ , which enhances  $g_{cw}$  (Boyer et al., 1997) and would be the case for many  
913 minimum conductance measurements but not for permeance methods, where isolated  
914 cuticle could shrink (Boyer, 2015). We also note the large discrepancy in sample sizes  
915 for estimates of  $g_{sw}$  ( $> 22,000$  observations) and  $g_{cw}$  (404 observations and only 148 for  
916 permeance-based methods). The development of a rapid method for assessing  $g_{cw}$   
917 would help in circumventing broken assumptions when  $g_{cw}/g_{sw}$  is high.

918

919 The source of cuticular water loss is (un)clear: some evidence suggests that the bulk of  
920 cuticular water loss occurs across the guard cell cuticles rather than the epidermal  
921 surface (Šantrůček et al., 2004). Such heterogeneity in cuticular conductance across a  
922 leaf would need to be accounted for to obtain accurate  $C_i$  estimates, especially if  
923 epidermal and guard cell cuticular water loss show differential responses to leaf turgor.  
924 This would only matter if the change in permeability with turgor of the guard cells was  
925 greater than the change in permeability with turgor in other cells on the leaf surface.  
926 However, much of the work measuring cuticle conductance focuses on either isolated



927 cuticle from astomatous leaf surface or a gravimetric determination of cuticle  
928 conductance, with assumptions on stomatal opening and closure.

929

930 However, we note that part of the apparent effect of cuticle conductance in some  
931 studies may be due to CO<sub>2</sub> gradients (finite  $g_{ias}$ ) within leaves. In fact, both processes  
932 can result in similar effects at low  $g_{sw}$  (Parkhurst, 1994; Fig. 6a), and each process  
933 could explain the evidence supporting the other process making partitioning difficult.  
934 Therefore, partitioning the impacts of  $g_{cw}$  and  $g_{ias}$  on  $C_i$  estimates should be a research  
935 priority.

936

937 Recommendations

938 We recommend the following:

- 939 1. Whenever possible, measure water potential (ideally  $\Psi_{m,apo}$ ) to estimate  $W_i$  inside  
940 the leaf.
- 941 2. If measurements are not possible, choose suitable values of  $\Psi$  from the literature  
942 and calculate  $W_i$ .
- 943 3. Be clear as to the definition of  $C_i$ : is it  $C_{i,es}$ ,  $C_{ias}$  or some other value? This will  
944 ensure that gas exchange parameters can be properly compared without  
945 confounding different aspects of leaf physiology.

946

947 In terms of understanding  $g_m$ , it is apparent that splitting  $g_m$  into its component parts  
948 (e.g.  $g_{ias}$ ,  $g_{liq}$ ) is necessary to understand how internal conductances respond to the  
949 environment. Given the likelihood of the variable location of  $C_i$  during most  $g_m$   
950 measurements, many of the  $g_m$  measurements may not be directly comparable as they  
951 would be comparing different resistance pathways. Given that recent data assessing  $W_i$   
952 inside leaves focused on xerophytic leaves (Cernusak et al., 2018), more data are  
953 needed to understand how  $W_i$  varies across environmental conditions in more  
954 mesophytic species, and especially angiosperms.

955

956 As a community, we have made significant advances within the Moss & Rawlins (1963)  
957 paradigm. Technological advances are now making it possible and crucial to move



958 beyond the Moss & Rawlins paradigm to further our understanding of photosynthesis  
959 and gaseous diffusion in leaves by addressing each of the assumptions (Fig. 8).

960

#### 961 *Code and Data*

962 All code is available as supplementary files (“Modeling.rmd”, “Reanalysis of gm  
963 data.rmd”, “Literature gc-gs-gias calculations.rmd”), as are input data  
964 (“popexample.csv”, “CO2response.csv”, “temp data.csv”, “gmlight.csv”, “cuticle  
965 conductance temp response.csv”, “cuticle\_bins.csv”, “WP.csv”, “Diffusion bins Onoda  
966 data.csv”). Modeling code automatically generates .csv files for the modeling analysis.

967

#### 968 **Acknowledgements**

969 We would like to thank Dr. Patrick J. Hudson for comments on an early draft of the  
970 manuscript and Dr. John S. Boyer for comments on a late draft. We would like to thank  
971 Yusuke Onoda for providing data on leaf thicknesses from Onoda et al. (2011) and Jordi  
972 Martínez-Vilalta for providing water potential data from Martínez-Vilalta et al. (2014).  
973 This work was also supported by funding to DTH through the NSF EPSCoR Program  
974 under Award # IIA-1301346 and through NSF IOS 1658951 at the University of New  
975 Mexico. Any opinions, findings, and conclusions or recommendations expressed in this  
976 material are those of the authors and do not necessarily reflect the views of the National  
977 Science Foundation. J.T. is supported by Research Fellowships for Young Scientists from the  
978 Japan Society for the Promotion of Science (JSPS).

979

980

#### 981 **Author Contributions**

982 All authors contributed to the design of the study. JRS performed the modeling. JRS  
983 wrote the manuscript with input from all authors.

984

## References

- Bargel H, Kock K, Cerman Z, Neinhuis C.** 2006. Evans review no. 3: structure-function relationships of the plant cuticle and cuticular waxes – a smart material? *Functional Plant Biology* **33**, 893-910.
- Boyer JS.** 2015a. Turgor and the transport of CO<sub>2</sub> and water across the cuticle (epidermis) of leaves. *Journal of Experimental Botany* **66**, 2625–2633.
- Boyer JS.** 2015b. Impact of cuticle on calculations of the CO<sub>2</sub> concentration inside leaves. *Planta* **242**, 1405–1412.
- Boyer JS, Kawamitsu Y.** 2011. Photosynthesis gas exchange system with internal CO<sub>2</sub> directly measured. *Environmental and Biological Control* **49**, 193-207.
- Boyer JS, Wong SC, Farquhar GD.** 1997. CO<sub>2</sub> and water vapor exchange across leaf cuticle (epidermis) at various water potentials. *Plant Physiology* **114**, 185–191.
- Brown HT, Escombe F.** 1900. Static diffusion of gases and liquids in relation to the assimilation of carbon and translocation in plants. *Philosophical Transactions of the Royal Society B* **193**: 185-193.
- Buckley TN, Farquhar GD, Mott KA.** 1997. Qualitative effects of patchy stomatal conductance distribution features on gas-exchange calculations. *Plant, Cell & Environment* **20**: 867-880.
- Buckley TN, John GP, Scoffoni C, Sack L.** 2017. The sites of evaporation within leaves. *Plant Physiology* **173**:1763-1782.
- Buckley TN, Sack L.** 2019. The humidity inside leaves and why you should care: implications of unsaturation of leaf intercellular airspaces. *American Journal of Botany* **106**(5):1-4.
- Campbell GS, Norman JM.** 1998. An introduction to environmental biophysics. Springer-Verlag, New York.
- Canny MJ, Huang CX.** 2006. Leaf water content and palisade cell size. *New Phytologist* **170**: 75-85.
- Cernusak LA, Goldsmith GR, Arend M, Siegwolf, RTW.** 2019. Effect of vapor pressure deficit on gas exchange in wild-type and abscisic acid-insensitive plants. *Plant Physiology* online early DOI:10.1104/pp.19.00436
- Cernusak LA, Ubierna N, Jenkins MW, Garrity SR, Rahn T, Powers HH, Hanson DT, Sevanto S, Wong SC, McDowell NG, Farquhar GD.** 2018. Unsaturation of vapour pressure inside leaves of two conifer species. *Scientific Reports* **8**: 7667.
- Cheeseman JM, Clough BF, Carter DR, Lovelock CE, Eong OJ, Sim RG.** 1991. The analysis of photosynthetic performance in leaves under field conditions: a case study using *Bruguiera* mangroves. *Photosynthesis Research*, **29**, 11-22.
- Dacey JWH.** 1981. Pressurized ventilation in the yellow waterlily. *Ecology* **62**: 1137-1147.

**Dacey JWH.** 1987. Knudsen-transitional flow and gas pressurization in leaves of *Nelumbo*. *Plant Physiology* **85**: 199-203.

**Douthe C, Dreyer E, Epron D, Warren CR.** 2011. Mesophyll conductance to CO<sub>2</sub>, assessed from online TDL-AS records of <sup>13</sup>CO<sub>2</sub> discrimination, displays small but significant short-term responses to CO<sub>2</sub> and irradiance in *Eucalyptus* seedlings. *Journal of Experimental Botany* **62**, 5335–5346.

**Downton WJS, Loveys BR, Grant WJR.** 1988. Non-uniform stomatal closure induced by water stress causes putative non-stomatal inhibition of photosynthesis. *New Phytologist* **110**: 503-509.

**Earles JM, Th eroux-Rancourt G, Roddy AB, Gilbert ME, McElrone AJ, Brodersen C.** 2018. Beyond porosity: 3D leaf intercellular airspace traits that impact mesophyll conductance. *Plant Physiology* **178**, 148-162.

**Egorov VP, Karpushkin LT.** 1988. Determination of air humidity over evaporating surface inside a leaf by a compensation method. *Photosynthetica* **22**: 394-404.

**Evans J.** 1995. Carbon fixation profiles do reflect light absorption profiles in leaves. *Australian Journal of Plant Physiology* **22**, 865-873.

**Evans JR, Caemmerer SV, Setchell BA, Hudson GS.** 1994. The relationship between CO<sub>2</sub> transfer conductance. *Australian Journal of Plant Physiology* **21**: 475-495.

**Evans JR, Loreto F.** 2000. Acquisition and diffusion of CO<sub>2</sub> in higher plant leaves. In: Leegood, R. C., Sharkey, T. D., von Caemmerer, S. eds. *Photosynthesis: Physiology and Metabolism*, Kluwer Academic Publishers, Netherlands, 321–351.

**Farquhar GD, von Caemmerer S, Berry JA.** 1980. A biochemical model of photosynthetic CO<sub>2</sub> assimilation in leaves of C<sub>3</sub> species. *Planta* **149**, 78–90.

**Farquhar GD, Cernusak LA.** 2012. Ternary effects on the gas exchange of isotopologues of carbon dioxide. *Plant, Cell & Environment* **35**, 1221–1231.

**Farquhar G, O’Leary M, Berry J.** 1982. On the relationship between carbon isotope discrimination and the intercellular carbon dioxide concentration in leaves. *Australian Journal of Plant Physiology* **9**, 121.

**Farquhar GD, Raschke K.** 1978. On the resistance to transpiration of sites of evaporation within leaf. *Plant Physiology* **61**: 1000-1005.

**Flexas J, Bota J, Escalona JM, Sampol B, Medrano H.** 2002. Effects of drought on photosynthesis in grapevines under field conditions: an evaluation of stomatal and mesophyll limitations. *Functional Plant Biology* **29**, 461.

**Gaastra P.** 1959. Photosynthesis of crop plants as influenced by light, carbon dioxide, temperature, and stomatal diffusion resistance. *Mededelingen van de Landbouwhogeschool te Wageningen, Nederland* **59**: 1-68.

**Gimenez C, Mitchell VJ, Lawlor DW.** 1992. Regulation of photosynthetic rate of two sunflower hybrids under water stress. *Plant Physiology* **98**: 516-514.

- Gunasekera D, Berkowitz GA.** 1992. Heterogenous stomatal closure in response to leaf water deficits is not a universal phenomenon. *Plant Physiology* **98**: 660-665.
- Hall AE.** 1982. Mathematical models of plant water loss and plant water relations. In: Lange OL, Nobel PS, Osmond CB, Ziegler H, eds. *Physiological plant ecology II*. Berlin, Heidelberg: Springer Berlin Heidelberg, 231–261.
- Hoad SP, Grace J, Jeffree CE.** 1996. A leaf disc method for measuring cuticular conductance. *Journal of Experimental Botany* **47**: 431-437.
- Hygen G.** 1951. Studies in plant transpiration I. *Physiologia Plantarum* **4**: 57-183.
- Hygen G.** 1953. Studies in plant transpiration II. *Physiologia Plantarum* **6**: 106-133.
- Jarvis PG, Slatyer RO.** 1970. The role of the mesophyll cell wall in leaf transpiration. *Planta* **80**: 303-322.
- Jones HG, Higgs KH.** 1980. Resistance to water loss from mesophyll cell surface in plant leaves. *Journal of Experimental Botany* **31**: 545-553.
- Karpushkin LT.** 1994. A compensation gasometric method for estimating the kinetic parameters of H<sub>2</sub>O and CO<sub>2</sub> exchange in plant leaves. *Russian Journal of Plant Physiology* **41**: 410-413.
- Kerstiens G.** 1996a. Cuticular water permeability and its physiological significance. *Journal of Experimental Botany* **47**: 1813-1832.
- Kerstiens G.** 1996b. Diffusion of water vapour and gases across cuticles and through stomatal pores presumed closed. In: **Kerstiens G**, ed. *Plant cuticles: and integrated functional approach* Oxford: Bios, 121-133.
- Kirschbaum MUF, Pearcy RW.** 1988. Gas exchange analysis of the relative importance of stomatal and biochemical factors in photosynthetic induction in *Alocasia macrorrhiza*. *Plant Physiology* **86**: 782-785.
- Laik A, Ojs V, Kull K.** 1980. Statistical distribution of stomatal apertures of *Vicia faba* and *Hordeum vulgare* and the Spannungsphase of stomatal opening. *Journal of Experimental Botany* **31**, 49-58.
- Lauer MJ, Boyer JS.** 1992. Internal CO<sub>2</sub> measured directly in leaves: Abscisic acid and low leaf water potential cause opposing effects. *Plant Physiology* **98**, 1310-1316.
- Lawlor DW.** 2002. Limitation to Photosynthesis in Water-stressed Leaves: Stomata vs. Metabolism and the Role of ATP. *Annals of Botany* **89**, 871–885.
- Lawson T, James W, Weyers J.** 1998. A surrogate measure of stomatal aperture. *Journal of Experimental Botany*, **49**, 1397-1403.
- Ledford H.** 2017. Overlooked water loss in plants could throw off climate models. *Nature* **546**, 585–586.
- Leuning R.** 1983. Transport of gases into leaves. *Plant, Cell & Environment* **6**: 181-194.

- Lin Y-S, Medlyn BE, Duursma RA, Prentice IC, Wang H, et al.** 2015. Optimal stomatal behaviour around the world. *Nature Climate Change* **5**, 459–464.
- Long SP, Farage PK, Bolhár-Nordenkamp HR, Rohrhofer U.** 1989. Separating the contribution of the upper and lower mesophyll to photosynthesis in *Zea mays* L. leaves. *Planta* **177**, 207–216.
- Li-Cor.** 2019. Using the LI-6800 portable photosynthesis system. *Li-Cor Biosciences*, Lincoln, NB.
- McAusland L, Davey PA, Kanwal N, Baker NR, Lawson T.** 2013. A novel system for spatial and temporal imaging of intrinsic plant water use efficiency. *Journal of experimental botany* **64**, 4993-5007.
- Mansfield LA, Hetherington AM, Atkinson CJ.** 1990. Some current aspects of stomatal physiology. *Annual Review of Plant Physiology and Plant Molecular Biology* **41**, 55–75.
- Martínez-Vilalta J, Poyatos R, Aquadé D, Retana J, Mencuccini M.** 2014. A new look at water transport regulation in plants. *New Phytologist* **204**, 105-115.
- Massman WJ.** 1998. A review of the molecular diffusivities of H<sub>2</sub>O, CO<sub>2</sub>, CH<sub>4</sub>, CO, O<sub>3</sub>, SO<sub>2</sub>, NH<sub>3</sub>, N<sub>2</sub>O, NO, and NO<sub>2</sub> in air, O<sub>2</sub> and N<sub>2</sub> near STP. *Atmospheric Environment* **32**, 1111-1127.
- Meyer S, Genty B.** 1998. Mapping intercellular CO<sub>2</sub> mole fraction (C<sub>i</sub>) in *Rosa rubiginosa* leaves fed with abscisic acid by using chlorophyll fluorescence imaging. Significance of C<sub>i</sub> estimated from leaf gas exchange. *Plant Physiology* **116**, 947–957.
- Mott KA.** 1988. Do stomata respond to CO<sub>2</sub> concentrations other than intercellular? *Plant Physiology* **86**, 200-203.
- Mott KA, Buckley TN.** 2000. Patchy stomatal conductance: emergent collective behaviour of stomata. *Trends in Plant Science* **5**: 258-262.
- Nobel P.** 1991. Physicochemical and environmental plant physiology. Academic Press San Diego.
- Nonami H, Boyer JS.** 1987. Origin of growth-induced water potential. *Plant Physiology* **83**, 596-601.
- Nonami H, Schulze E-D, Ziegler H.** 1991. Mechanisms of stomatal movement in response to air humidity, irradiance and xylem water potential. *Planta* **183**: 57-64.
- Oleson KW, Lawrence DM, Bonan GB, Dreniak B, Huang M, Koven CD, Levis S, Li F, Riley WJ, Subin ZM, et al.** 2013. Technical description of version 4.5 of the Community Land Model (CLM). Boulder, CO: National Center for Atmospheric Research.
- Onoda Y, Westoby M, Adler PB, Choong AMF, Clissold FJ, Cornelissen JHC, Diaz S, Dominy NJ, Elgart A, Enrico L, et al.** 2011. Global patterns of leaf mechanical properties. *Ecology Letters* **14**, 301-312.

- Parkhurst DF.** 1994. Diffusion of CO<sub>2</sub> and other gases inside leaves. *New Phytologist* **126**: 449-479.
- Parkhurst DF.** 1984. Mesophyll resistance to photosynthetic carbon dioxide uptakes in leaves: dependence on stomatal aperture. *Canadian Journal of Botany* **62**: 163-165.
- Parkhurst DF.** 1977. A three-dimensional model for CO<sub>2</sub> uptake by continuously distributed mesophyll in leaves. *Journal of Theoretical Biology* **67**: 471-488.
- Parkhurst DF, Mott KA.** 1990. Intercellular diffusion limits to CO<sub>2</sub> uptake in leaves. *Plant Physiology* **94**: 1024-1032.
- Parkhurst DF, Wong S-C, Farquhar GD, Cowan IR.** 1988. Gradients of intercellular CO<sub>2</sub> levels across the leaf mesophyll. *Plant Physiology* **86**: 1032-1037.
- Pons TL, Flexas J, von Caemmerer S, Evans JR, Genty B, Ribas-Carbo M, Brugnoli E.** 2009. Estimating mesophyll conductance to CO<sub>2</sub>: methodology, potential errors, and recommendations. *Journal of Experimental Botany* **60**, 2217–2234.
- Riederer M, Schreiber L.** 2001. Protecting against water loss: analysis of the barrier properties of plant cuticles. *Journal of Experimental Botany* **52**, 2023–2032.
- Šantrůček J, Šimáňová E, Karbůlková J, Šimková M, Schreiber L.** 2004. A new technique for measurement of water permeability of stomatous cuticular membranes isolated from *Hedera helix* leaves. *Journal of Experimental Botany* **55**: 1411-1422.
- Scafaro AP, Von Caemmerer S, Evans JR, Atwell BJ.** 2011. Temperature response of mesophyll conductance in cultivated and wild *Oryza* species with contrasting mesophyll cell wall thickness. *Plant, Cell & Environment* **34**, 1999–2008.
- Schuster A-C, Burghardt M, Riederer M.** 2017. The ecophysiology of leaf cuticular transpiration: are cuticular water permeabilities adapted to ecological conditions? *Journal of Experimental Botany* **68**, 5271–5279.
- Sharkey TD, Seemann JR.** 1989. Mild water stress effects on carbon-reduction-cycle intermediates, ribulose biphosphate carboxylase activity, and spatial homogeneity of photosynthesis in intact leaves. *Plant Physiology* **89**: 1060-1065.
- Sharkey TD, Imai K, Farquhar GD, Cowan IR.** 1982. A direct confirmation of the standard method of estimating intercellular partial pressure of CO<sub>2</sub>. *Plant Physiology* **69**, 657–659.
- Slavik B.** 1958 The influence of water deficit on transpiration. *Physiologia Plantarum* **11**: 524-535.
- Smith NG, Dukes JS.** 2017. LCE: leaf carbon exchange data set for tropical, temperate, and boreal species of North and Central America. *Ecology* **98**.
- Steinberg SL.** 1996. Mass and energy exchange between the atmosphere and leaf influence gas pressurization in aquatic plants. *New Phytologist* **134**: 587-599.



**Stinziano JR, Morgan PB, Lynch DJ, Saathoff AJ, McDermitt DK, Hanson DT.** 2017. The rapid A-C<sub>i</sub> response: photosynthesis in the phenomic era. *Plant, Cell & Environment* **40**, 1256–1262.

**Terashima I, Wong SC, Osmond CB, Farquhar GD.** 1988. Characterization of non-uniform photosynthesis induced by abscisic acid in leaves having different mesophyll anatomies. *Plant and Cell Physiology* **29**, 385–394.

**Terashima I.** 1992. Anatomy of non-uniform leaf photosynthesis. *Photosynthesis research*, **31**, 195–212.

**Tezara W, Mitchell VJ, Driscoll SD, Lawlor DW.** 1999. Water stress inhibits plant photosynthesis by decreasing coupling factor and ATP. *Nature* **401**: 914-917

**Tholen D, Zhu X-G.** 2011. The mechanistic basis of internal conductance: a theoretical analysis of mesophyll cell photosynthesis and CO<sub>2</sub> diffusion. *Plant Physiology* **178**

**Tominaga J, Kawamitsu Y.** 2015*b*. Tracing Photosynthetic Response Curves with Internal CO<sub>2</sub> measured directly. *European Chemical Bulletin* **53**, 27–34.

**Tominaga J, Kawamitsu Y.** 2015*a*. Cuticle affects calculations of internal CO<sub>2</sub> in leaves closing their stomata. *Plant & Cell Physiology* **56**, 1900–1908.

**Tominaga J, Shimada H, Kawamitsu Y.** 2018. Direct measurement solves overestimation of intercellular CO<sub>2</sub> concentration in leaf gas-exchange measurements. *Journal of Experimental Botany* **69**, 1981-1991.

**Van Gardingen PR, Jeffree CE, Grace J.** 1989. Variation in stomatal aperture in leaves of *Avena latua* L observed by low-temperature scanning electron microscopy. *Plant Cell & Environment* **12**, 887-898.

**Vogel JC.** 1980. Fractionation of the carbon isotopes during photosynthesis. Fractionation of the carbon isotopes during photosynthesis. Berlin, Heidelberg: Springer Berlin Heidelberg, 5–29.

**Vrábl D, Vasková M, Hronková M, Flexas J, Santrucek J.** 2009. Mesophyll conductance to CO<sub>2</sub> transport estimated by two independent methods: effect of variable CO<sub>2</sub> concentration and abscisic acid. *Journal of Experimental Botany* **60**, 2315–2323.

**Ward DA, Bunce JA.** 1986. Novel evidence for a lack of water-vapor saturation within the intercellular airspace of turgid leaves of mesophytic species. *Journal of Experimental Botany* **37**: 504-516.

**West JD, Peak D, Peterson JQ, Mott KA.** 2005. Dynamics of stomatal patches for a single surface of *Xanthium strumarium* L. leaves observed with fluorescence and thermal images. *Plant, Cell & Environment* **28**, 633-641.

**Weyers JDB, Lawson T.** 1997. Heterogeneity in stomatal characteristics. *Advances in Botanical Research* **26**: 317-352.

**Wingate L, Seibt U, Moncrieff JB, Jarvis PG, Lloyd J.** 2007. Variations in  $^{13}\text{C}$  discrimination during  $\text{CO}_2$  exchange by *Picea sitchensis* branches in the field. *Plant, Cell & Environment* **30**, 600–616.

**Wise RR, Ortiz-Lopez A, Ort DR.** 1992. Spatial distribution of photosynthesis during drought in field-grown and acclimated and nonacclimated growth chamber-grown cotton. *Plant Physiology* **100**, 26-32.



## Tables

Table 1. Reported  $C_i$  for direct tests of the Moss and Rawlins (1963) assumptions.

| Species                                   | Experiment                | $g_{sw}$                                | $C_a$                           | $C_i$ differential <sup>a</sup> | Study                          |
|-------------------------------------------|---------------------------|-----------------------------------------|---------------------------------|---------------------------------|--------------------------------|
|                                           |                           | (mmol m <sup>-2</sup> s <sup>-1</sup> ) | ( $\mu$ mol mol <sup>-1</sup> ) |                                 |                                |
| mean / single / range                     |                           |                                         |                                 |                                 |                                |
| Hypostomatous leaves                      |                           |                                         |                                 |                                 |                                |
| <i>Vitis vinifera</i>                     | control                   | 178                                     | 350                             | 3                               | Boyer <i>et al.</i> (1997)     |
| (both sides)                              | high CO <sub>2</sub>      | 19                                      | 1100                            | 126                             |                                |
| <i>Vitis vinifera</i>                     | control                   | 4.4                                     | 350                             | 291                             |                                |
| (astomatous side) <sup>d</sup>            | high CO <sub>2</sub>      | 4.2                                     | 1100                            | 940                             |                                |
| <i>Vitis vinifera</i> <sup>c</sup>        | high CO <sub>2</sub>      | 0.73                                    | 10000                           | 9436                            | Boyer (2015b)                  |
| (astomatous side) <sup>d</sup>            |                           |                                         |                                 |                                 |                                |
| <i>Passiflora edulis</i>                  | various T <sub>leaf</sub> | 0.21                                    | 400                             | 267 – 432                       | Tominaga <i>et al.</i> (2018)  |
| (astomatous side) <sup>d</sup>            |                           |                                         |                                 |                                 |                                |
| Amphistomatous leaves                     |                           |                                         |                                 |                                 |                                |
|                                           | various CO <sub>2</sub>   |                                         | 88 – 619                        | 3 – 9                           |                                |
| <i>Xanthium strumarium</i> <sup>b</sup>   | various light             | not reported                            | 333 – 349                       | -10 – 0                         | Sharkey <i>et al.</i> (1982)   |
|                                           | dark                      |                                         | 352                             | -19                             |                                |
| <i>Gossypium hirsutum</i> <sup>b</sup>    | various VPD               |                                         | 330                             | -14 – 14                        |                                |
| <i>Brassica chinensis</i> <sup>b</sup>    |                           |                                         |                                 | 31                              |                                |
| <i>Eucalyptus pauciflora</i> <sup>b</sup> |                           |                                         |                                 | 54                              |                                |
| <i>Gossypium hirsutum</i> <sup>b</sup>    | various species           | not reported                            | 309 – 338                       | 24                              | Parkhurst <i>et al.</i> (1988) |
| <i>Phaseolus vulgaris</i> <sup>b</sup>    |                           |                                         |                                 | 29                              |                                |
| <i>Spinacia oleracea</i> <sup>b</sup>     |                           |                                         |                                 | 34                              |                                |
| <i>Helianthus annuus</i>                  | very high CO <sub>2</sub> | 260-280                                 | 10000 – 50000                   | <150                            | Boyer & Kawamitsu (2011)       |
| <i>Helianthus annuus</i>                  | control                   | 205                                     | 400                             | 30                              | Boyer (2015a)                  |
|                                           | ABA                       | 37                                      |                                 | 245                             |                                |
| <i>Helianthus annuus</i>                  | A/Ci curve                | 248 – 488                               | 34 – 1556                       | -10 – 36                        | Tominaga & Kawamitsu (2015b)   |
|                                           | A/Ci curve                | 18 – 86                                 | 31 – 1982                       | -10 – 451                       |                                |
|                                           | ABA                       |                                         |                                 |                                 |                                |
| <i>Helianthus annuus</i>                  | A/Ci curve                | 264 – 307                               | 24 – 320                        | -4 – 0                          | Tominaga <i>et al.</i> (2018)  |
|                                           | A/Ci curve                | 336 – 401                               | 24 – 344                        | -1 – 4                          |                                |
| <i>Phaseolus vulgaris</i>                 | high SD                   |                                         |                                 |                                 |                                |
|                                           | A/Ci curve                | 37 – 40                                 | 22 – 652                        | -6 – 166                        |                                |
|                                           | low SD                    |                                         |                                 |                                 |                                |

Data were retrieved from either texts or figures unless the raw data are available.

<sup>a</sup> $C_i$  differential = Calculated  $C_i$  – measured  $C_i$

<sup>b</sup>CO<sub>2</sub> concentrations are shown in  $\mu$ bar. 1  $\mu$ bar is 1  $\mu$ mol mol<sup>-1</sup> at standard pressure of 1013 bar.

<sup>c</sup>Ci was recalculated from Fig. 2 in Boyer (2015b), according to the model by von Caemmer & Farquhar (1981).

<sup>d</sup>For gas exchange measurements on astomatous side in hypostomatous leaves,  $g_{sw}$  indicates cuticle conductance ( $g_{cw}$ ).



Table 2. Cuticular permeances from Riederer and Schreiber (2001) re-interpreted as cuticular conductance ( $g_{cw}$ ) and transpiration ( $E_c$ ).

| Species                         | Temperature (K) | Permeance ( $m s^{-1} \times 10^6$ ) | $g_{cw}$ ( $mmol m^{-2} s^{-1}$ ) | $E_c$ ( $\mu mol m^{-2} s^{-1}$ ) | Source                        |
|---------------------------------|-----------------|--------------------------------------|-----------------------------------|-----------------------------------|-------------------------------|
| <i>Citrus aurantium</i>         | 298             | 71.0                                 | 0.29                              | 9.1                               | Baur, 1997                    |
| <i>Ficus elastica</i>           | 298             | 18.0                                 | 0.07                              | 2.3                               |                               |
| <i>Hedera helix</i>             | 298             | 7.4                                  | 0.03                              | 0.9                               |                               |
| <i>Pyrus communis</i>           | 298             | 670.0                                | 2.76                              | 85.6                              |                               |
| <i>Stephanotis floribunda</i>   | 298             | 330.0                                | 1.36                              | 42.2                              |                               |
| <i>Citrus aurantium</i>         | 298             | 120.0                                | 0.49                              | 15.3                              | Becker <i>et al.</i> , 1986   |
| <i>Clivia miniata</i>           | 298             | 11.0                                 | 0.05                              | 1.4                               |                               |
| <i>Ficus elastica</i>           | 298             | 43.0                                 | 0.18                              | 5.5                               |                               |
| <i>Hedera helix</i>             | 298             | 27.0                                 | 0.11                              | 3.5                               |                               |
| <i>Nerium oleander</i>          | 298             | 33.0                                 | 0.14                              | 4.2                               |                               |
| <i>Pyrus communis</i>           | 298             | 120.0                                | 0.49                              | 15.3                              |                               |
| <i>Schefflera actinophylla</i>  | 298             | 8.2                                  | 0.03                              | 1.0                               |                               |
| <i>Citrus aurantium</i>         | 298             | 690.0                                | 2.84                              | 88.2                              |                               |
| <i>Citrus aurantium</i>         | 298             | 470.0                                | 1.93                              | 60.1                              | Haas and Schonherr, 1979      |
| <i>Anthurium brownii</i>        | 303             | 11.5                                 | 0.05                              | 1.9                               | Helbsing <i>et al.</i> , 2001 |
| <i>Anthurium salviniae</i>      | 303             | 6.8                                  | 0.03                              | 1.1                               |                               |
| <i>Aspasia principissa</i>      | 303             | 4.6                                  | 0.02                              | 0.8                               |                               |
| <i>Caularthron bilamellatum</i> | 303             | 11.3                                 | 0.05                              | 1.9                               |                               |
| <i>Epidendrum nocturum</i>      | 303             | 17.7                                 | 0.07                              | 3.0                               |                               |
| <i>Notylia pentachne</i>        | 303             | 12.7                                 | 0.05                              | 2.1                               |                               |
| <i>Oncidium ampliatum</i>       | 303             | 9.5                                  | 0.04                              | 1.6                               |                               |
| <i>Peperomia cordulata</i>      | 303             | 46.1                                 | 0.19                              | 7.8                               |                               |
| <i>Philodendron radiatum</i>    | 303             | 11.8                                 | 0.05                              | 2.0                               |                               |
| <i>Philodendron tripartitum</i> | 303             | 11.2                                 | 0.05                              | 1.9                               |                               |
| <i>Polystachya foliosa</i>      | 303             | 60.7                                 | 0.25                              | 10.2                              |                               |

|                                |     |        |      |       |                               |
|--------------------------------|-----|--------|------|-------|-------------------------------|
| <i>Sobralia fenzliana</i>      | 303 | 26.6   | 0.11 | 4.5   |                               |
| <i>Sobralia suaveolens</i>     | 303 | 16.9   | 0.07 | 2.8   |                               |
| <i>Trichopilia maculata</i>    | 303 | 21.7   | 0.09 | 3.7   |                               |
| <i>Abies alba</i>              | 293 | 1400.0 | 5.86 | 134.4 | Lenzian <i>et al.</i> , 1986  |
| <i>Citrus aurantium</i>        | 293 | 450.0  | 1.88 | 43.2  |                               |
| <i>Camellia sinensis</i>       | 298 | 57.8   | 0.24 | 7.4   | Reiderer and Schreiber, 2001  |
| <i>Citrus aurantium</i>        | 298 | 95.2   | 0.39 | 12.2  |                               |
| <i>Clivia miniata</i>          | 298 | 4.8    | 0.02 | 0.6   |                               |
| <i>Clusia flava</i>            | 298 | 20.2   | 0.08 | 2.6   |                               |
| <i>Clusia uvitana</i>          | 298 | 48.7   | 0.20 | 6.2   |                               |
| <i>Clusia uvitana</i>          | 298 | 137.0  | 0.56 | 17.5  |                               |
| <i>Corynocarpus laevigatus</i> | 298 | 49.7   | 0.20 | 6.4   |                               |
| <i>Cydonia oblongata</i>       | 298 | 101.0  | 0.42 | 12.9  |                               |
| <i>Euonymus japonica</i>       | 298 | 79.2   | 0.33 | 10.1  |                               |
| <i>Ficus elastica</i>          | 298 | 14.6   | 0.06 | 1.9   |                               |
| <i>Ficus elastica</i>          | 298 | 39.5   | 0.16 | 5.0   |                               |
| <i>Forsythia intermedia</i>    | 298 | 86.2   | 0.35 | 11.0  |                               |
| <i>Garcinia spicata</i>        | 298 | 63.8   | 0.26 | 8.2   |                               |
| <i>Hedera helix</i>            | 298 | 21.7   | 0.09 | 2.8   |                               |
| <i>Monstera deliciosa</i>      | 298 | 24.3   | 0.10 | 3.1   |                               |
| <i>Nerium oleander</i>         | 298 | 40.0   | 0.16 | 5.1   |                               |
| <i>Philodendron ilsemanii</i>  | 298 | 10.4   | 0.04 | 1.3   |                               |
| <i>Pyrus communis</i>          | 298 | 63.4   | 0.26 | 8.1   |                               |
| <i>Pyrus communis</i>          | 298 | 82.9   | 0.34 | 10.6  |                               |
| <i>Vanilla planifolia</i>      | 298 | 3.6    | 0.01 | 0.5   |                               |
| <i>Allium cepa</i>             | 298 | 190.0  | 0.78 | 24.3  | Schonherr and Merida, 1981    |
| <i>Citrus aurantium</i>        | 298 | 150.0  | 0.62 | 19.2  | Schonherr and Schmidt, 1979   |
| <i>Citrus aurantium</i>        | 298 | 280.0  | 1.15 | 35.8  |                               |
| <i>Camellia sinensis</i>       | 298 | 46.8   | 0.19 | 6.0   | Schreiber and Riederer, 1996b |

|                                |     |       |      |      |
|--------------------------------|-----|-------|------|------|
| <i>Citrus aurantium</i>        | 298 | 55.5  | 0.23 | 7.1  |
| <i>Citrus limon</i>            | 298 | 204.0 | 0.84 | 26.1 |
| <i>Clivia miniata</i>          | 298 | 68.1  | 0.28 | 8.7  |
| <i>Cydonia oblongata</i>       | 298 | 273.0 | 1.12 | 34.9 |
| <i>Euonymus japonica</i>       | 298 | 155.0 | 0.64 | 19.8 |
| <i>Ficus benjamina</i>         | 298 | 56.4  | 0.23 | 7.2  |
| <i>Ficus elastica</i>          | 298 | 40.7  | 0.17 | 5.2  |
| <i>Forsythia suspensa</i>      | 298 | 168.0 | 0.69 | 21.5 |
| <i>Gingko biloba</i>           | 298 | 226.0 | 0.93 | 28.9 |
| <i>Hedera helix</i>            | 298 | 24.7  | 0.10 | 3.2  |
| <i>Juglans regia</i>           | 298 | 199.0 | 0.82 | 25.4 |
| <i>Ligustrum vulgare</i>       | 298 | 188.0 | 0.77 | 24.0 |
| <i>Liriodendron tulipifera</i> | 298 | 182.0 | 0.75 | 23.3 |
| <i>Maianthemum bifolium</i>    | 298 | 481.0 | 1.98 | 61.5 |
| <i>Monstera deliciosa</i>      | 298 | 18.6  | 0.08 | 2.4  |
| <i>Nerium oleander</i>         | 298 | 226.0 | 0.93 | 28.9 |
| <i>Olea europaea</i>           | 298 | 54.6  | 0.22 | 7.0  |
| <i>Philodendron selloum</i>    | 298 | 28.6  | 0.12 | 3.7  |
| <i>Prunus laurocerasus</i>     | 298 | 57.7  | 0.24 | 7.4  |
| <i>Vanilla planifolia</i>      | 298 | 7.4   | 0.03 | 0.9  |

---

## Figures

**Figure 1** – Density plot of measured (a) cuticle ( $g_c$ ), (b) stomatal ( $g_s$ ) values, and (c) maximum theoretical intercellular airspace conductance ( $g_{ias}$ ) values assuming diffusion through 12.5% of leaf thickness for amphistomatous leaves (Amphi) and 87.5% of leaf thickness for hypostomatous leaves (Hypo). (a) Data was compiled from Riederer and Schreiber (2001) and the supplementary information from Schuster et al. (2017). Black line indicates 1% of the median value from (b), while dashed lines indicate method-specific medians. (b) Data was compiled from Lin et al. (2015) and Smith and Dukes (2017). (c) Leaf thickness data used to calculate maximum  $g_{ias}$  from Onoda et al. (2011).

**Figure 2** – Implications of intercellular water vapor concentration ( $W_i$ ) as a percentage of saturation vapor pressure (VPD) for (a) conductance ( $g$ ) calculations, and the effects of (b) water potential ( $\Psi$ ) and (c) leaf to air vapor pressure deficit ( $VPD_{leaf}$ ). a) When  $\Psi = 0$  MPa,  $W_i = 100\% e_s$ , and  $VPD = 0$  kPa, then  $g$  represents stomatal conductance ( $g_s$ ). When  $\Psi = 0$  MPa,  $W_i = 100\% e_s$ , and  $VPD > 0$  kPa, then  $1/g$  represents  $1/g_s + 1/g_{ias}$  (intercellular airspace conductance). When  $\Psi < 0$  MPa,  $W_i < 100\% e_s$ , and  $VPD > 0$  kPa, then  $1/g$  represents  $1/g_s + 1/g_{ias} + 1/g_{liq}$  where  $g_{liq}$  is liquid conductance into the cell. Potential locations of  $C_{i,es}$  ( $CO_2$  concentration at the evaporating surface) are indicated by black lines. b) As  $\Psi$  decreases, the location of calculated  $W_i$  recedes further into the leaf and into the cell. c) As  $VPD_{leaf}$  increases, the location of  $W_i$  recedes away from the substomatal cavity.  $C_c$ : chloroplastic  $CO_2$  concentration,  $C_{ias}$ :  $CO_2$  concentration of the intercellular airspace.

**Figure 3** – Water use efficiency as a function of intercellular [ $CO_2$ ] accounting for cuticular conductance ( $C_{icuticle}$ ), and the relationship with the proportion of stomatal conductance attributed to cuticular conductance.  $iWUE$ : intrinsic water use efficiency.

**Figure 4**– The sensitivity of intercellular [ $CO_2$ ] ( $C_i$ ) (a, c, e) and mesophyll conductance ( $g_m$ ) (b, d, f) to the proportion of stomatal conductance attributed to cuticle conductance.



(a) Data from Douthe et al. (2011); (b) Data from Vrabl et al. (2009); (c, d) Data from Scafaro et al. (2011) assuming (c) the highest temperature sensitivity of cuticular conductance or (d) the lowest temperature sensitivity of cuticular conductance from Riederer and Schreiber (2001). For unrestricted axes and  $C_i$  comparisons, see Figs. S1, S2; for  $g_m$  comparisons, see Figs. S3, S4, S5).

**Figure 5** – a) Response of  $A_{net}$  to  $C_i$  under different  $g_{cw}$  scenarios. b) Response of  $g_{sw}$  to  $C_i$  under different  $g_{cw}$  scenarios. Solid lines indicate value of  $g_{cw}$  across curve. c) Response of  $V_{cmax}$  to  $J_{max}$  as a function of the proportion of  $g_{sw}$  attributed to  $g_{cw}$ . Re-interpreted A- $C_i$  data extracted from Vrabl et al. (2009).  $A_{net}$ : net  $CO_2$  assimilation;  $C_i$ : intercellular  $CO_2$  concentration;  $g_{cw}$ : cuticle conductance to water;  $g_{sw}$ : stomatal conductance to water;  $J_{max}$ : maximum rate of electron transport to RuBP regeneration; Proportion: proportion of  $g_{sw}$  attributed to  $g_{cw}$  at a reference  $CO_2$  of  $400 \mu\text{mol mol}^{-1}$ ;  $V_{cmax}$ : maximum rate of rubisco carboxylation capacity.

**Figure 6** – Effects of  $CO_2$  gradients (finite  $g_{ias}$ ) and cuticle conductance ( $g_c$ ) on calculated  $C_i$  ( $\Delta C_i$ ) (a, b, c),  $g_s$  (d, e, f), and  $\Delta V_{cmax}$  (g, h, i), when intercellular water vapor concentration ( $W_i$ ) is at 100% (a, d, g), 95% (b, e, h), and 90% (c, f, i) of saturation vapor pressure ( $e_s$ ).  $g_{s\_actual}$ : actual stomatal conductance given the assumptions;  $g_{s\_ref}$ : reference  $g_s$  where  $g_c = 0$ ,  $g_i \text{ mmol m}^{-2} \text{ s}^{-1}_s = \text{infinity}$ , and  $W_i = 100\% e_s$ ;  $Ng_{ias}$ : no  $CO_2$  gradient;  $Yg_{ias}$ :  $CO_2$  gradient present,  $g_{ias} = 1000 \text{ mmol m}^{-2} \text{ s}^{-1}$ ;  $Ng_c$ :  $g_c = 0 \text{ mmol m}^{-2} \text{ s}^{-1}$ ;  $Yg_c$ :  $g_c = 10 \text{ mmol m}^{-2} \text{ s}^{-1}$ ;  $\Delta V_{cmax}$ : percent change in maximum rate of Rubisco carboxylation.

**Figure 7** – Modelled impacts of intercellular [ $H_2O$ ] ( $W_i$ ), cuticle conductance ( $g_c$ ), and intercellular airspace conductance ( $g_{ias}$ ) on mesophyll conductance ( $g_m$ ) expressed as a change in  $g_m$  ( $\Delta g_m$  (%)), across a range of reference  $g_s$  values ( $g_{s\_ref}$ ).  $W_i$  is either a) 100% saturation vapor pressure ( $e_s$ ), b) 95%  $e_s$ , or c) 90%  $e_s$ . Reference value for  $g_m$  is  $0.48 \text{ mol m}^{-2} \text{ s}^{-1}$  at 1 atmosphere. For  $\Delta g_m < 10\%$  in  $Ng_{ias}Yg_c$ ,  $g_{s\_ref}$  must exceed  $0.187 \text{ mol m}^{-2} \text{ s}^{-1}$ ,  $0.168 \text{ mol m}^{-2} \text{ s}^{-1}$ , and  $0.15 \text{ mol m}^{-2} \text{ s}^{-1}$  in a), b), and c), respectively.  $Ng_{ias}$ :

no CO<sub>2</sub> gradient; Y<sub>g<sub>ias</sub></sub>: CO<sub>2</sub> gradient present, g<sub>ias</sub> = 1000 mmol m<sup>-2</sup> s<sup>-1</sup>; Ng<sub>c</sub>: g<sub>c</sub> = 0 mmol m<sup>-2</sup> s<sup>-1</sup>; Yg<sub>c</sub>: g<sub>c</sub> = 10 mmol m<sup>-2</sup> s<sup>-1</sup>.

**Figure 8** – Relative effects of departures from each assumption on calculated C<sub>i</sub> (C<sub>ic</sub>) relative to actual C<sub>i</sub> under constant A and constant measured conductance (g).

**Assumption 1:** increasing g<sub>cw</sub> causes C<sub>ic</sub> to increase, leading to overestimation of C<sub>i</sub>, with a stronger effect at lower g. **Assumption 2:** decreasing g<sub>ias</sub> causes C<sub>ic</sub> to increase, leading to overestimation of C<sub>i</sub>, with a stronger effect at higher g. **Assumption 3:** decreasing W<sub>i</sub> from 100% SVP causes C<sub>ic</sub> to decrease, leading to underestimation of C<sub>i</sub>, with a stronger effect at lower g. Decreasing leaf water potential (Ψ<sub>m,apo</sub>) causes W<sub>i</sub> to decrease, causing C<sub>ic</sub> to decrease and underestimate C<sub>i</sub>. **Assumption 4:** positively skewed stomatal apertures means that stomata are more closed than expected based on g, such that C<sub>ic</sub> overestimates C<sub>i</sub>. Likewise, negatively skewed stomatal apertures means that stomata are more open than expected based on g, such that C<sub>ic</sub> underestimates C<sub>i</sub>. This results from influences on g<sub>ias</sub> – smaller than expected stomatal apertures means that the effective pathlength for diffusion is longer, decreasing g<sub>ias</sub> relative to an “expected value”, while larger than expected stomatal apertures means that the effective pathlength for diffusion is smaller, increasing g<sub>ias</sub> relative to an “expected value”. In the second case and under Assumption 2, the difference in g<sub>ias</sub> would be a difference between a smaller and larger infinite value. **Assumption 5:** a pressurized leaf relative to air (ΔP<sub>leaf-to-air</sub> > 0) means that calculated W<sub>i</sub> is higher than the expected e<sub>s</sub>, causing C<sub>ic</sub> to overestimate C<sub>i</sub>, and a negatively pressurized leaf (ΔP<sub>leaf-to-air</sub> < 0) means that W<sub>i</sub> is lower than the expected e<sub>s</sub>, causing C<sub>ic</sub> to underestimate C<sub>i</sub>. Note that the pressure will also have implications for the diffusion dynamics, but we do not address them here. **Assumption 6:** when D<sub>H<sub>2</sub>O</sub>/D<sub>CO<sub>2</sub></sub> > 1.6, g<sub>sc</sub> is overestimated, causing C<sub>ic</sub> to overestimate C<sub>i</sub>, while D<sub>H<sub>2</sub>O</sub>/D<sub>CO<sub>2</sub></sub> < 1.6 causes underestimation of g<sub>sc</sub>, leading C<sub>ic</sub> to underestimate C<sub>i</sub>. Note that these effects are stronger under smaller values of g. **Assumption 7:** when considering gas exchange in 3-D, tortuosity of the pathway and homo/heterobaricity of the leaf (which could feed into tortuosity), and leaf thickness impact g<sub>ias</sub>, with higher tortuosity, lower heterobaricity and thicker leaves, decreasing g<sub>ias</sub>, causing C<sub>ic</sub> to overestimate C<sub>i</sub>. **Note:** tortuosity, heterobaricity, and leaf thickness will influence g<sub>ias</sub>. Assumptions 3 and 5 feed into assumption 3, while assumptions 4 and 7 feed into assumption 2.

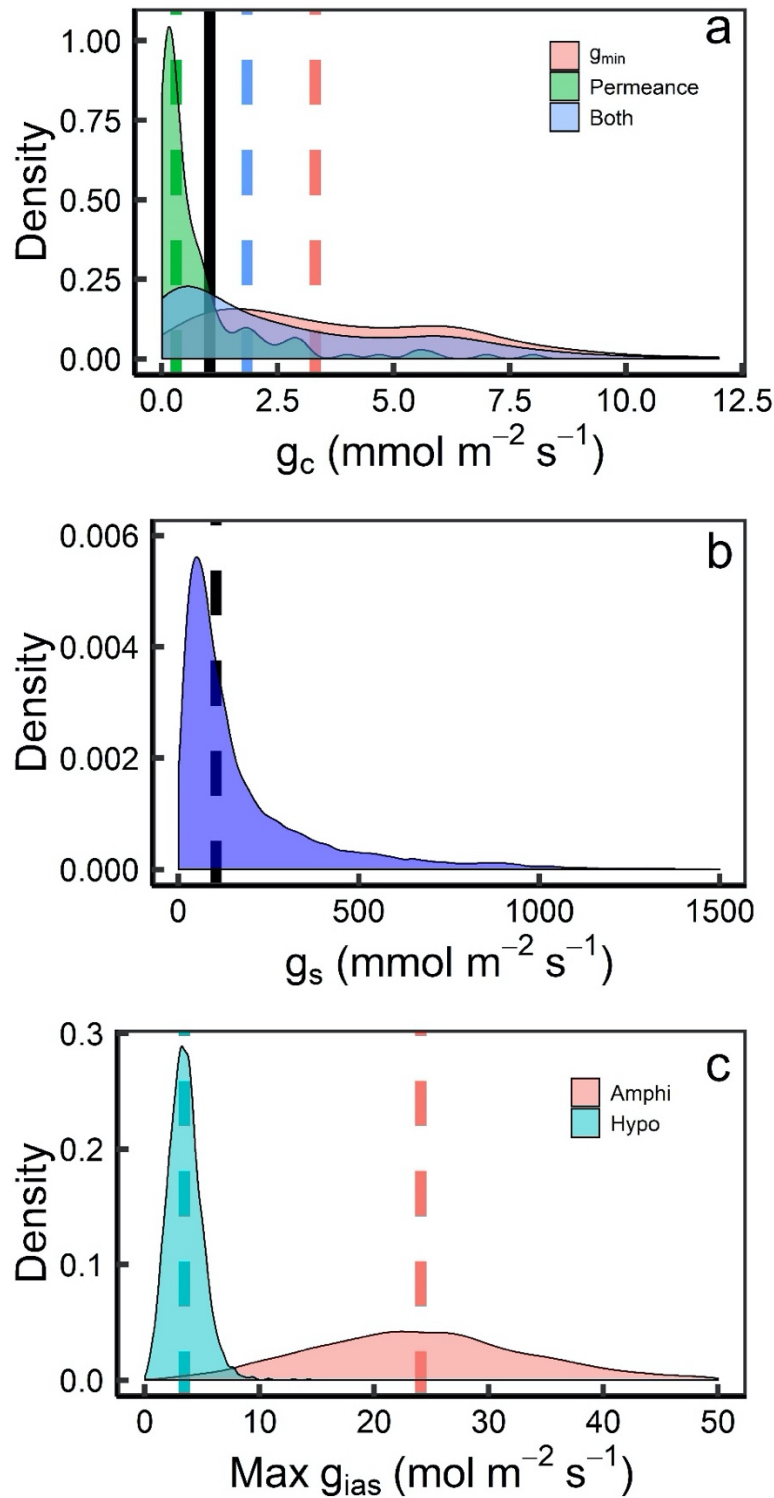

Figure 1

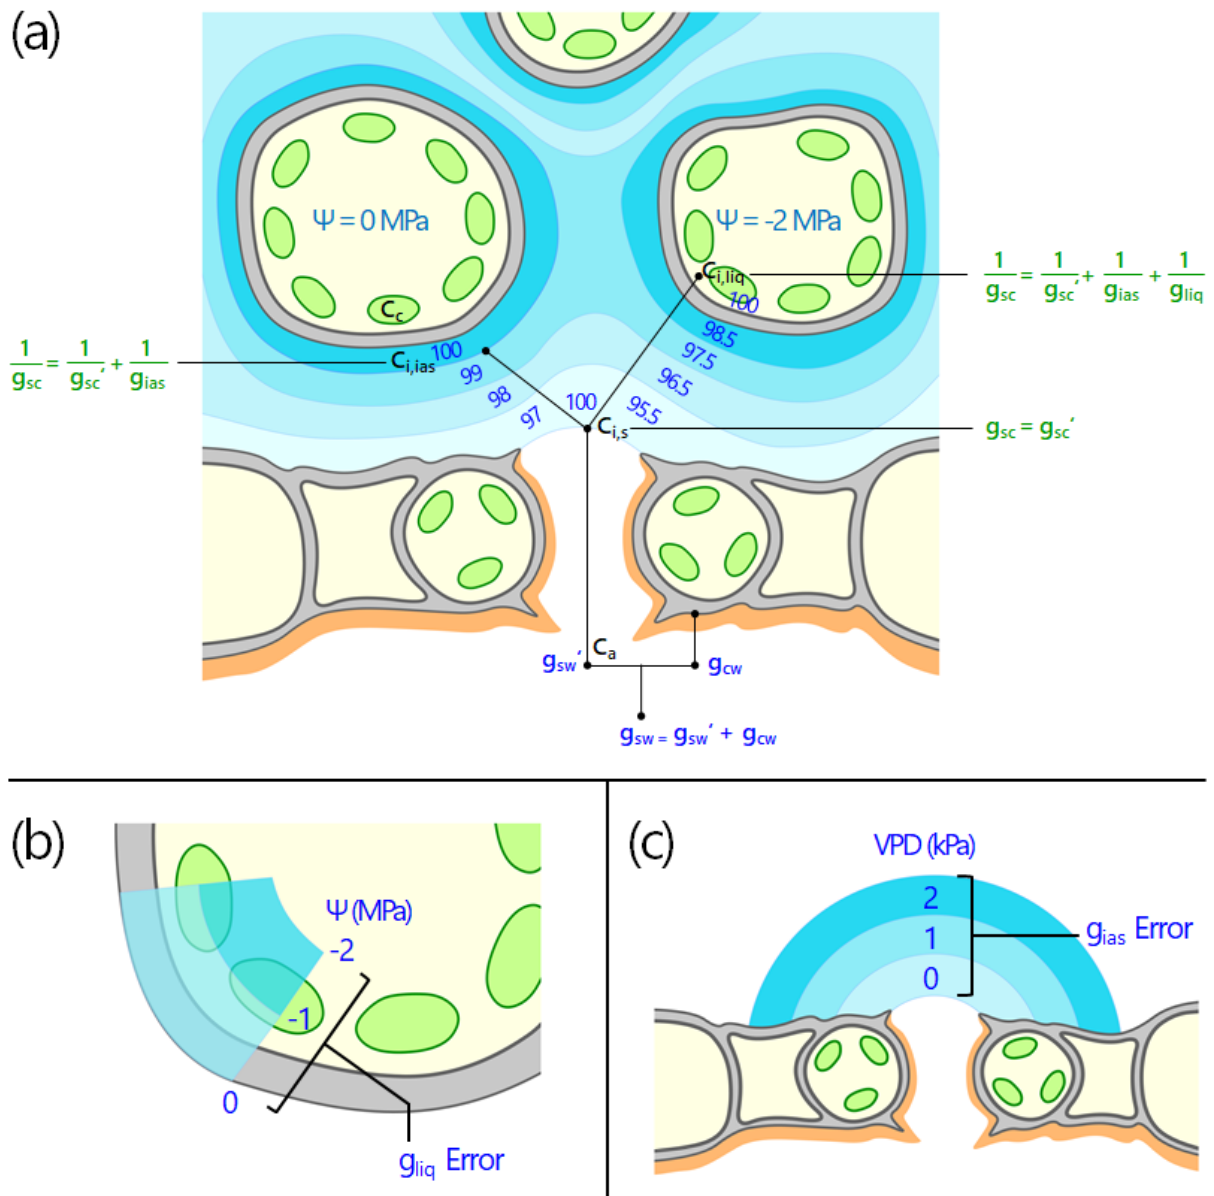

Figure 2

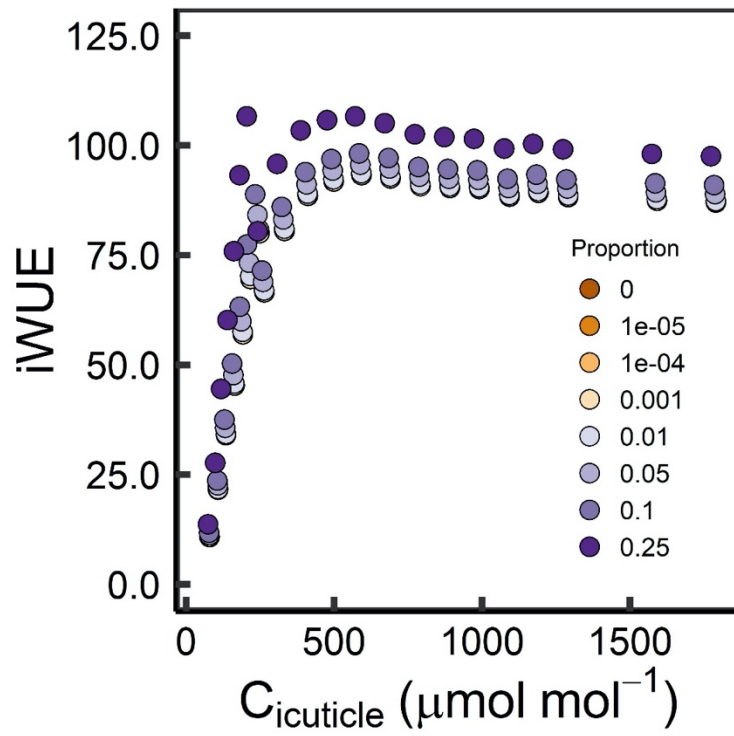

Figure 3

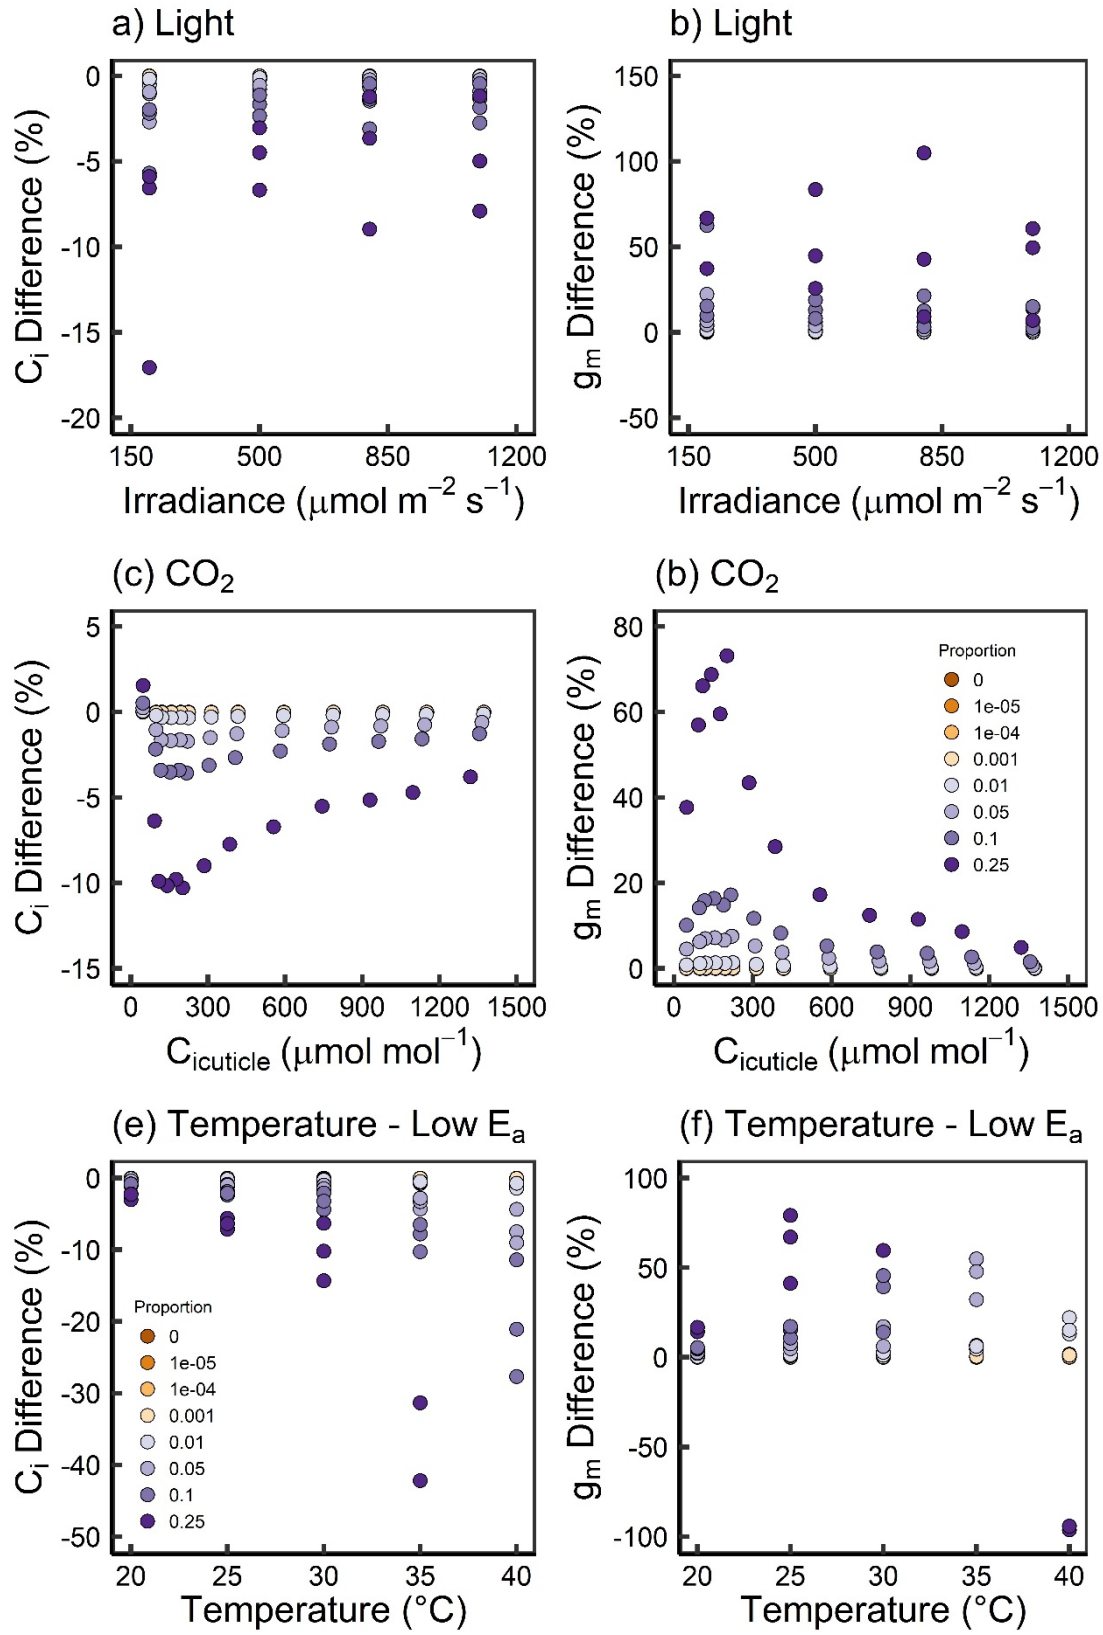

**Figure 4**

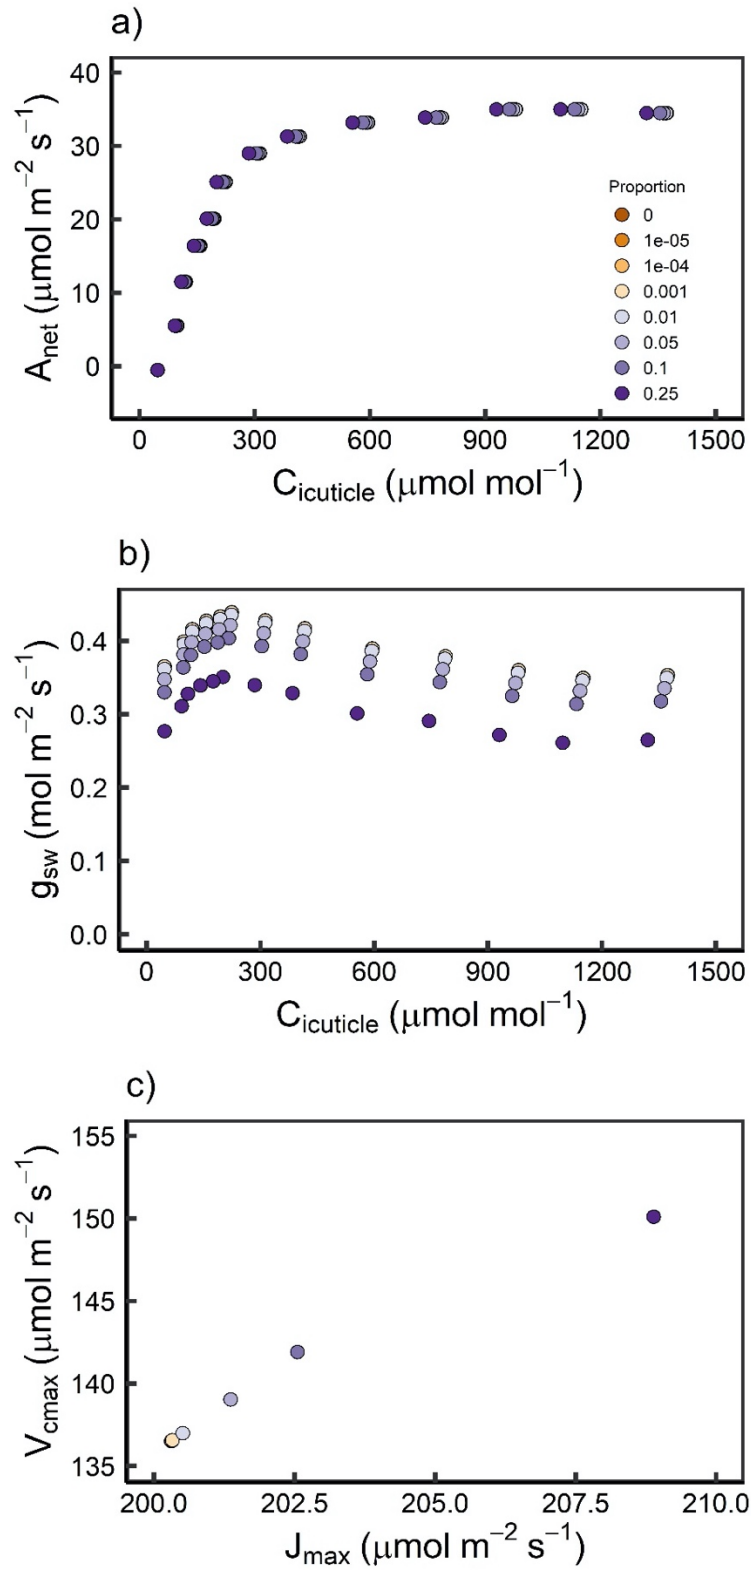

Figure 5



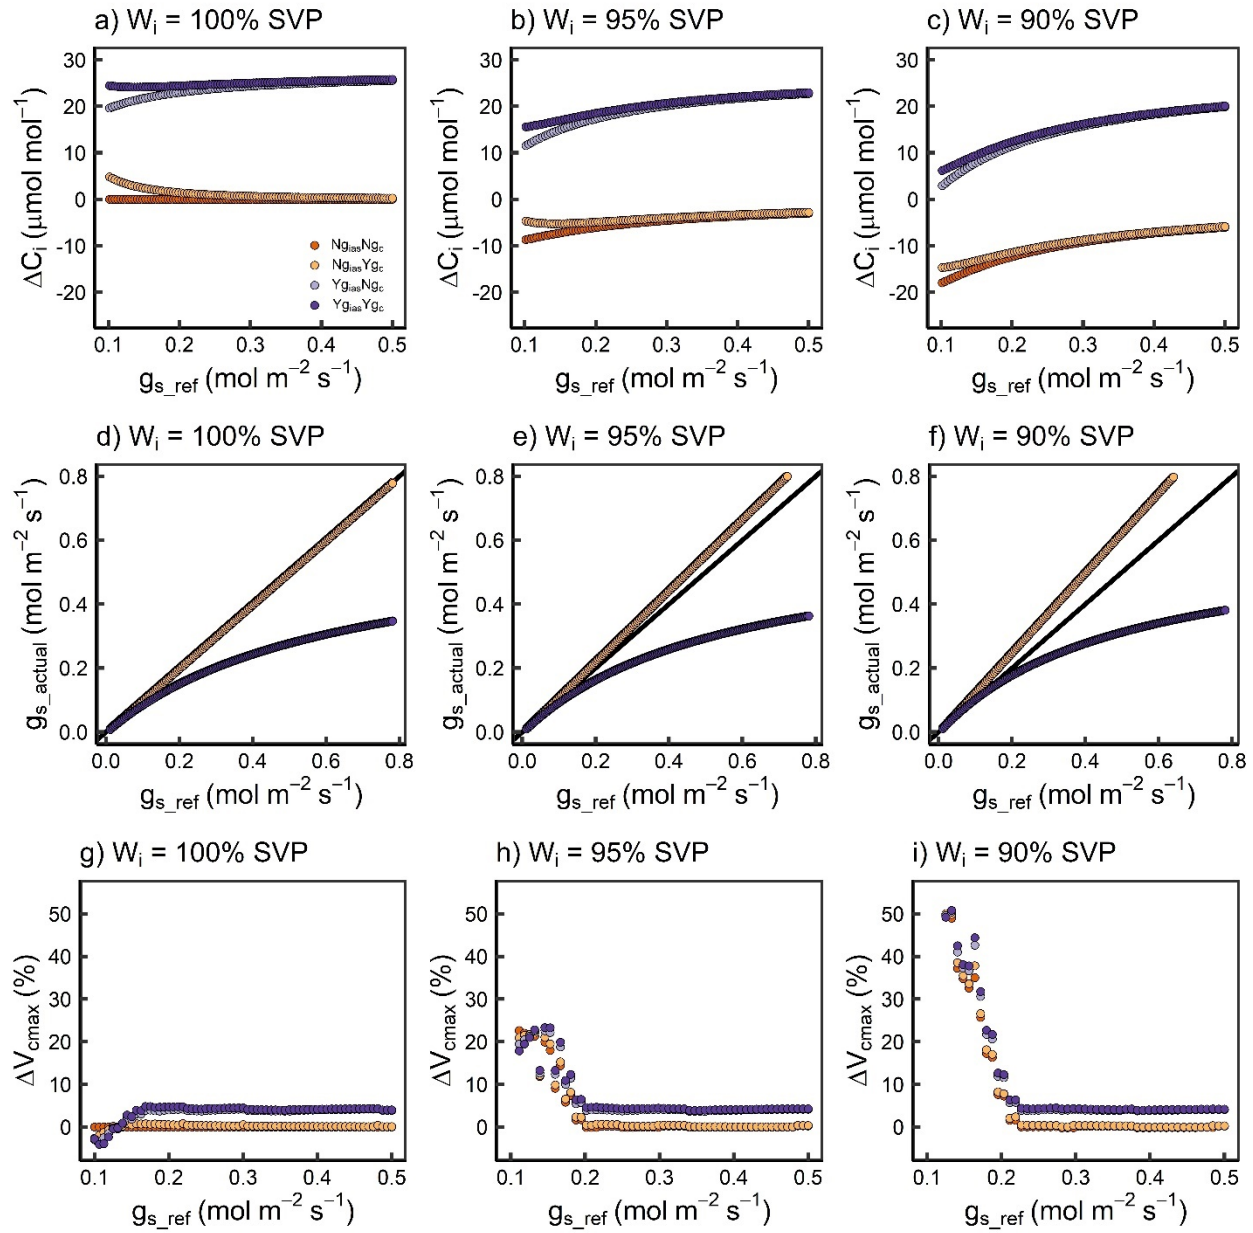

Figure 6

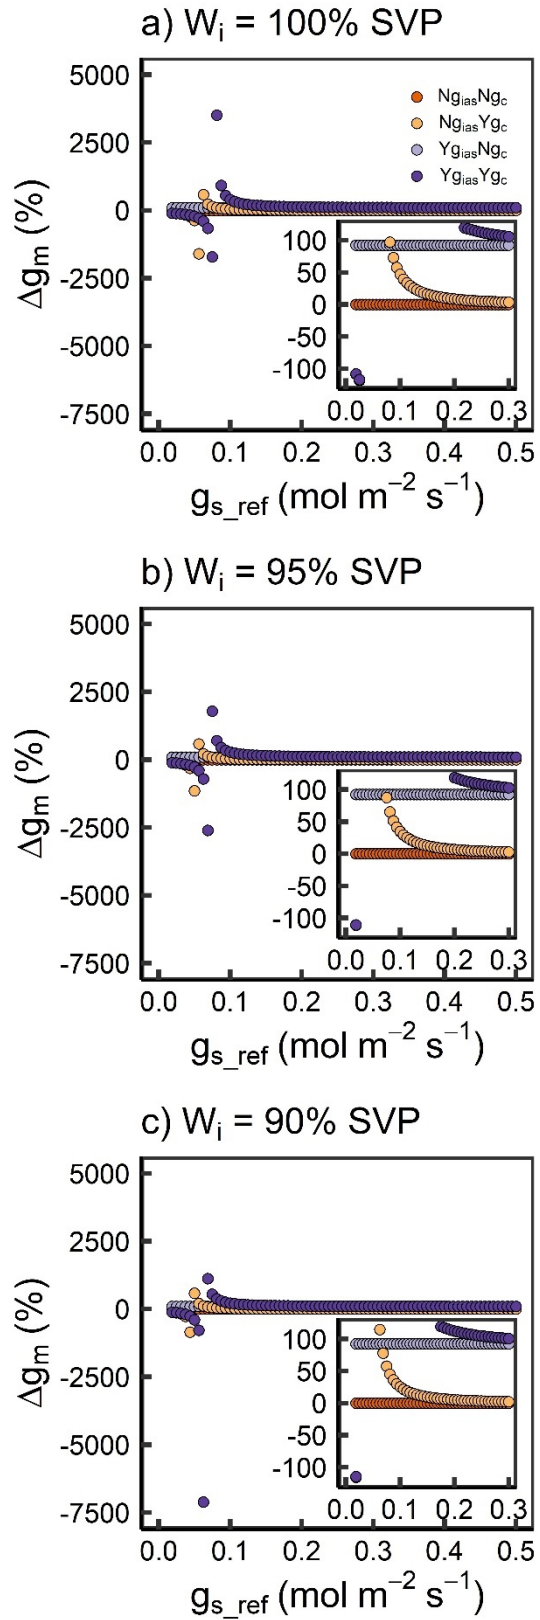

Figure 7

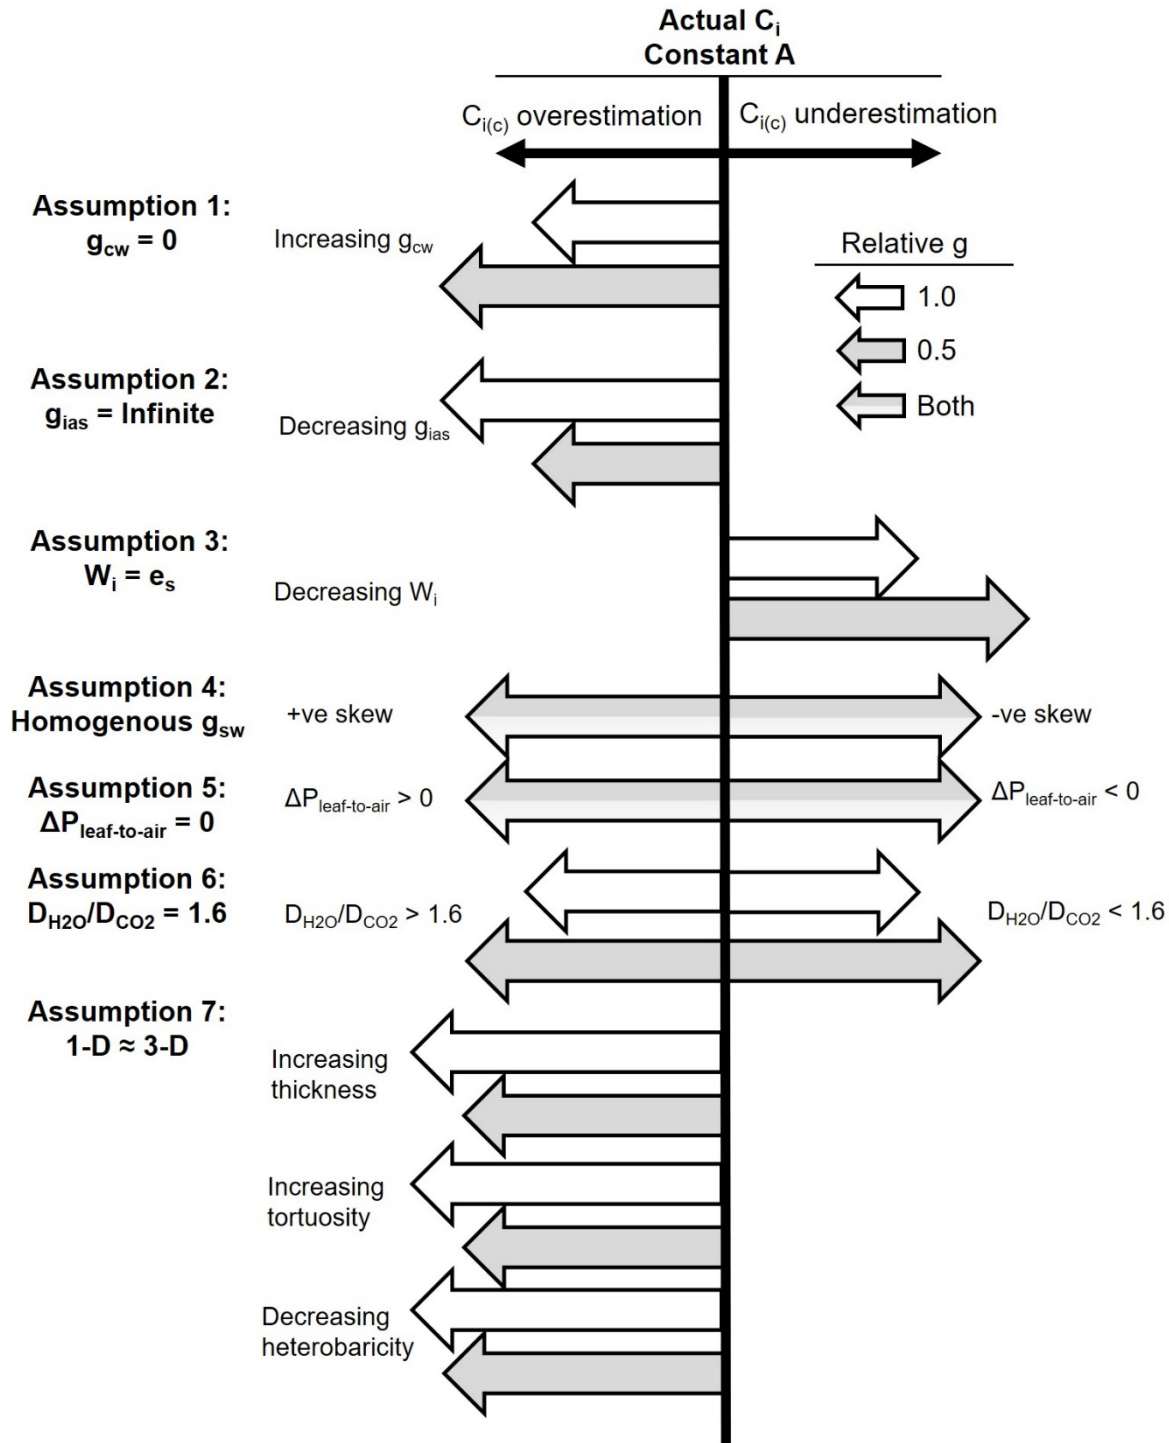

**Figure 8**

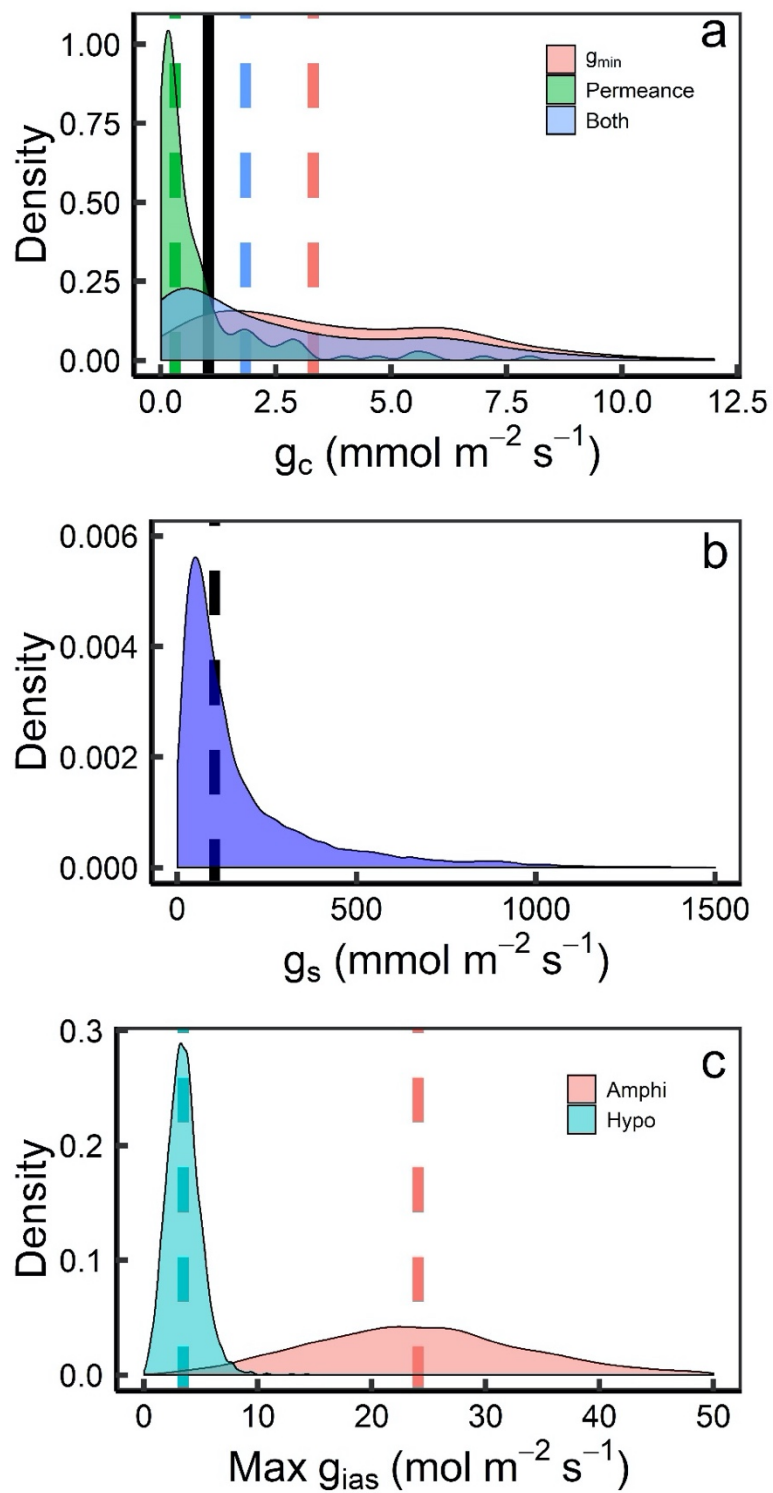

Figure 1



Figure 2

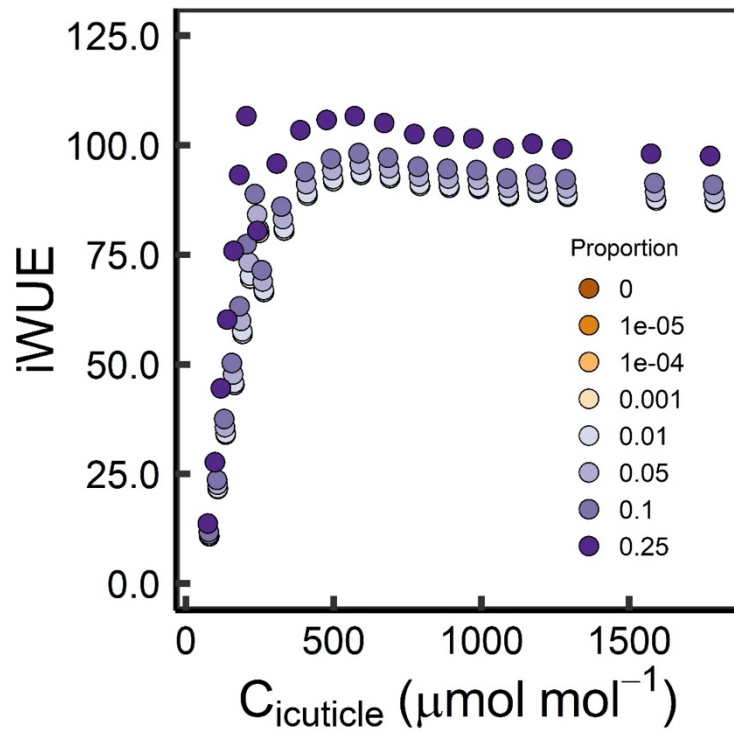

Figure 3



**Figure 4**



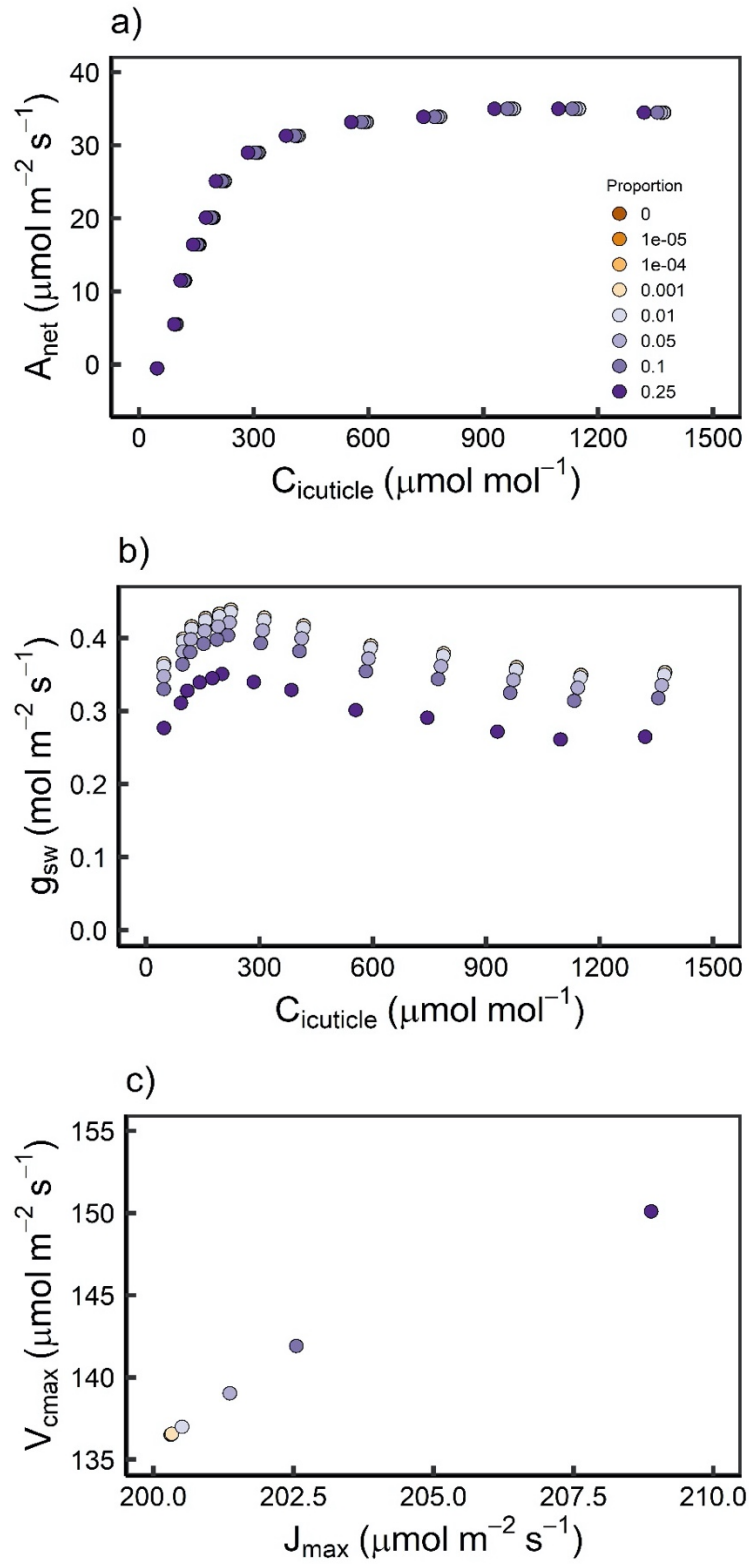

Figure 5



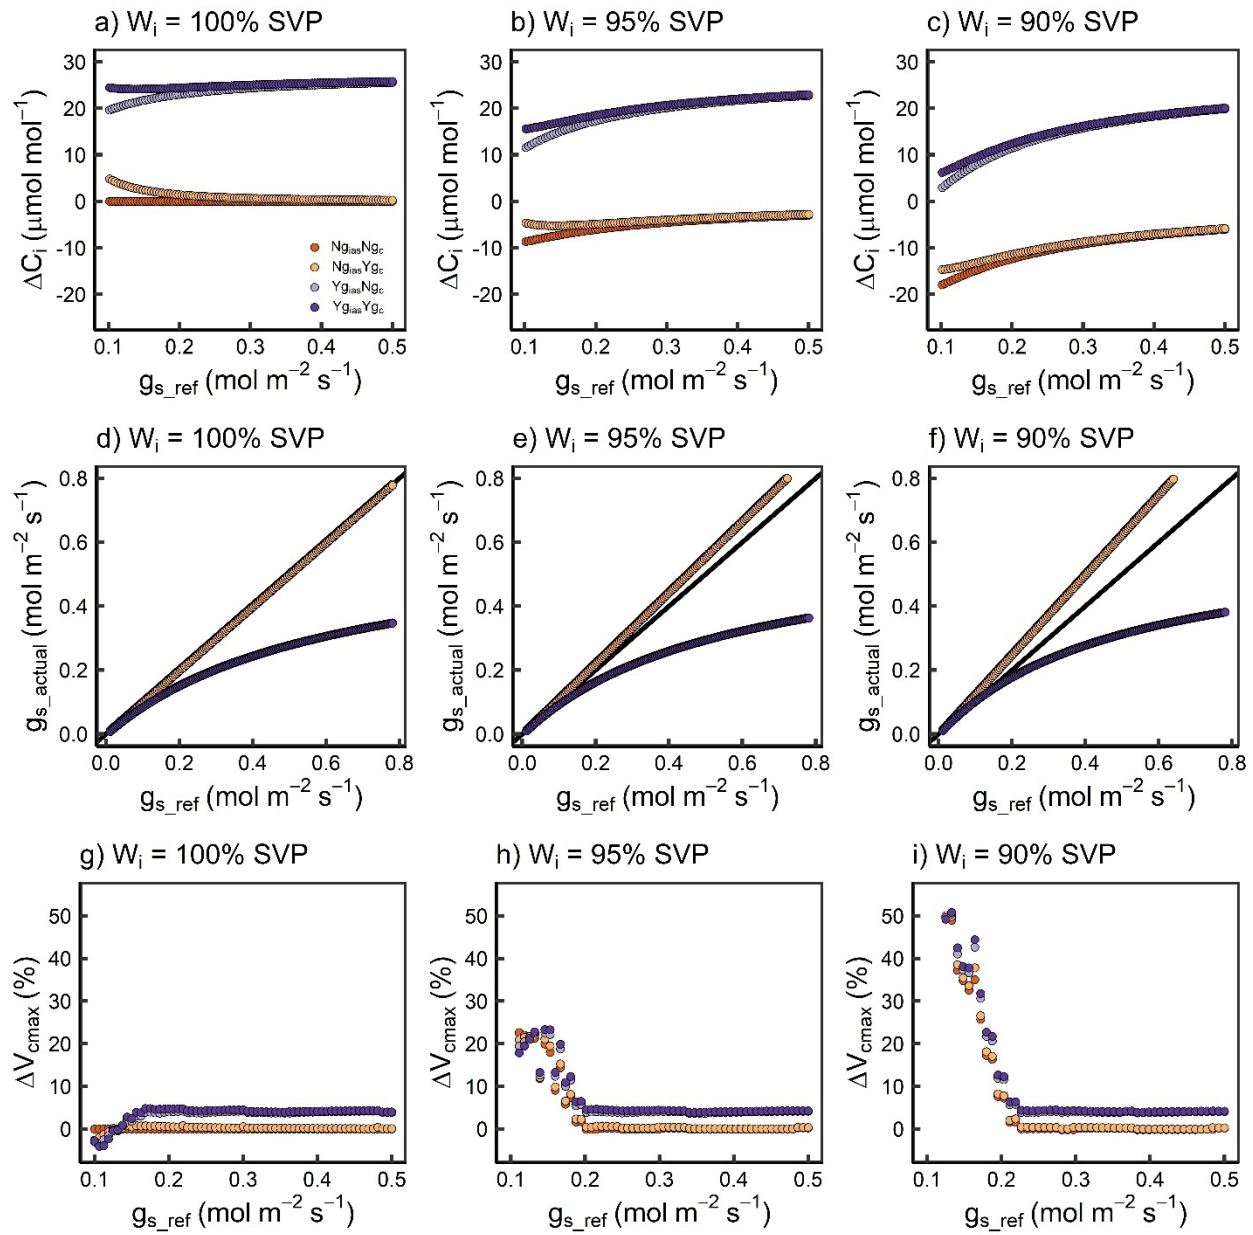

**Figure 6**



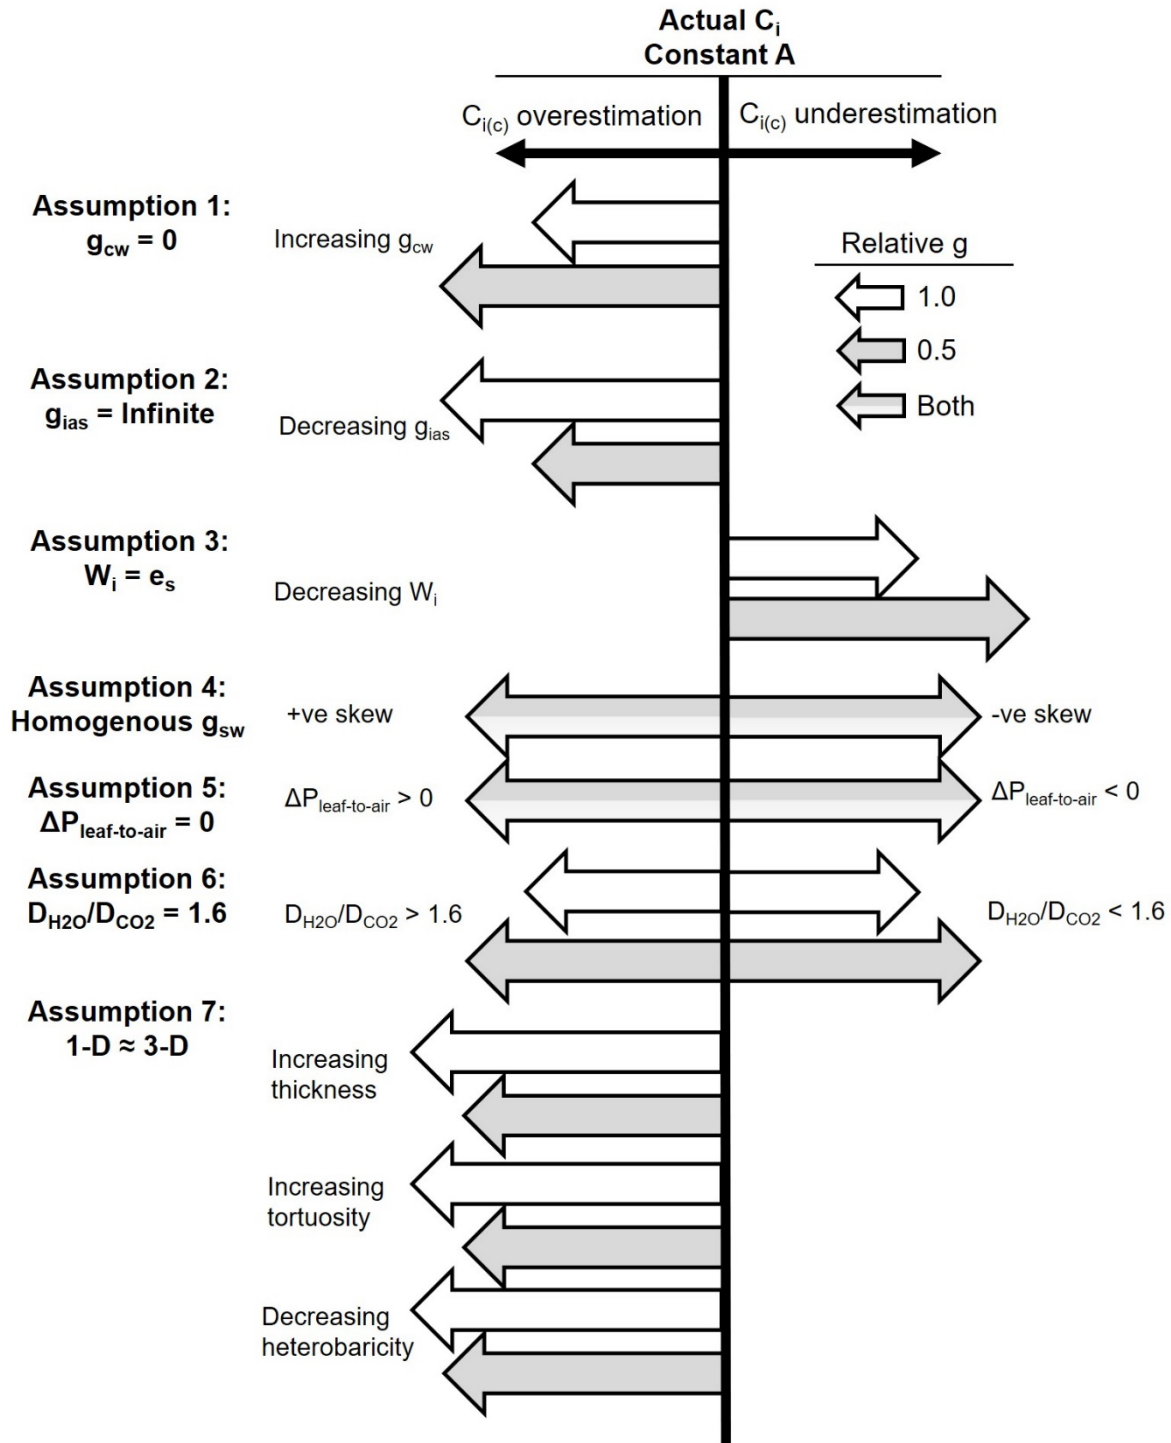

**Figure 8**
